# Supplementary material for: Effects of general versus regional anaesthesia on circadian melatonin rhythm and its association with postoperative delirium in elderly patients undergoing hip fracture surgery: study protocol for a prospective cohort clinical trial
Source: PubMed Central journal article supplement — BMJ Open. 2021 Feb 12;11(2):e043720. doi: 10.1136/bmjopen-2020-043720 (PMC7883867; doi:10.1136/bmjopen-2020-043720), 2021-02-12
Supplement: bmjopen-2020-043720.draft_revisions.pdf [file bmjopen-2020-043720.draft_revisions.pdf]

# BMJ Open

BMJ Open is committed to open peer review. As part of this commitment we make the peer review history of every article we publish publicly available.

When an article is published we post the peer reviewers' comments and the authors' responses online. We also post the versions of the paper that were used during peer review. These are the versions that the peer review comments apply to.

The versions of the paper that follow are the versions that were submitted during the peer review process. They are not the versions of record or the final published versions. They should not be cited or distributed as the published version of this manuscript.

BMJ Open is an open access journal and the full, final, typeset and author-corrected version of record of the manuscript is available on our site with no access controls, subscription charges or pay-per-view fees (<http://bmjopen.bmj.com>).

If you have any questions on BMJ Open's open peer review process please email [info.bmjopen@bmj.com](mailto:info.bmjopen@bmj.com)

# BMJ Open

## Effects of general versus regional anesthesia on circadian melatonin rhythm and its association with postoperative delirium in elderly patients undergoing hip fracture surgery: study protocol for a prospective cohort clinical trial

|                               |                                                                                                                                                                                                                                                                                                                                                                                                                                                                                                                                                                                                                                                                                                                                                                                                                                                                                                                                         |
|-------------------------------|-----------------------------------------------------------------------------------------------------------------------------------------------------------------------------------------------------------------------------------------------------------------------------------------------------------------------------------------------------------------------------------------------------------------------------------------------------------------------------------------------------------------------------------------------------------------------------------------------------------------------------------------------------------------------------------------------------------------------------------------------------------------------------------------------------------------------------------------------------------------------------------------------------------------------------------------|
| Journal:                      | <i>BMJ Open</i>                                                                                                                                                                                                                                                                                                                                                                                                                                                                                                                                                                                                                                                                                                                                                                                                                                                                                                                         |
| Manuscript ID                 | bmjopen-2020-043720                                                                                                                                                                                                                                                                                                                                                                                                                                                                                                                                                                                                                                                                                                                                                                                                                                                                                                                     |
| Article Type:                 | Protocol                                                                                                                                                                                                                                                                                                                                                                                                                                                                                                                                                                                                                                                                                                                                                                                                                                                                                                                                |
| Date Submitted by the Author: | 11-Aug-2020                                                                                                                                                                                                                                                                                                                                                                                                                                                                                                                                                                                                                                                                                                                                                                                                                                                                                                                             |
| Complete List of Authors:     | Yuan, Yi; Beijing Jishuitan Hospital<br>Song, Yanan; Peking University Third Hospital, Department of Anesthesiology<br>Wang, Geng; Beijing Jishuitan Hospital and Fourth Medical College of Peking University Department of Radiology, Department of Anesthesiology<br>Jia, Yunyang; Beijing Jishuitan Hospital<br>zhou, Yang; Peking University Third Hospital<br>Mi, Xinning; Peking University Third Hospital<br>Jia, Xixi; Peking University Third Hospital<br>Wang, Xiaoxiao; Peking University Third Hospital, Research Center of Clinical Epidemiology<br>Liu, Chang; Peking University Third Hospital<br>Li, Yue ; Peking University Third Hospital<br>Shi, Chengmei; Peking University Third Hospital<br>Han, Yongzheng; Peking University Third Hospital, Anesthesiology<br>Guo, Xiangyang; Peking University Third Hospital<br>Zhang, Wenchao; Beijing Jishuitan Hospital<br>Li, Zhengqian; Peking University Third Hospital |
| Keywords:                     | ANAESTHETICS, Anaesthesia in neurology < ANAESTHETICS, Adult anaesthesia < ANAESTHETICS                                                                                                                                                                                                                                                                                                                                                                                                                                                                                                                                                                                                                                                                                                                                                                                                                                                 |
|                               |                                                                                                                                                                                                                                                                                                                                                                                                                                                                                                                                                                                                                                                                                                                                                                                                                                                                                                                                         |

SCHOLARONE™  
Manuscripts

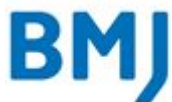

I, the Submitting Author has the right to grant and does grant on behalf of all authors of the Work (as defined in the below author licence), an exclusive licence and/or a non-exclusive licence for contributions from authors who are: i) UK Crown employees; ii) where BMJ has agreed a CC-BY licence shall apply, and/or iii) in accordance with the terms applicable for US Federal Government officers or employees acting as part of their official duties; on a worldwide, perpetual, irrevocable, royalty-free basis to BMJ Publishing Group Ltd ("BMJ") its licensees and where the relevant Journal is co-owned by BMJ to the co-owners of the Journal, to publish the Work in this journal and any other BMJ products and to exploit all rights, as set out in our [licence](#).

The Submitting Author accepts and understands that any supply made under these terms is made by BMJ to the Submitting Author unless you are acting as an employee on behalf of your employer or a postgraduate student of an affiliated institution which is paying any applicable article publishing charge ("APC") for Open Access articles. Where the Submitting Author wishes to make the Work available on an Open Access basis (and intends to pay the relevant APC), the terms of reuse of such Open Access shall be governed by a Creative Commons licence – details of these licences and which [Creative Commons](#) licence will apply to this Work are set out in our licence referred to above.

Other than as permitted in any relevant BMJ Author's Self Archiving Policies, I confirm this Work has not been accepted for publication elsewhere, is not being considered for publication elsewhere and does not duplicate material already published. I confirm all authors consent to publication of this Work and authorise the granting of this licence.

**Title**

Effects of general versus regional anesthesia on circadian melatonin rhythm and its association with postoperative delirium in elderly patients undergoing hip fracture surgery: study protocol for a prospective cohort clinical trial

**Author**

Yi Yuan<sup>1#</sup>, Yanan Song<sup>2#</sup>, Geng Wang<sup>1</sup>, Yunyang Jia<sup>3</sup>, Yang Zhou<sup>2</sup>, Xinning Mi<sup>2</sup>, Xixi Jia<sup>2</sup>, Xiaoxiao Wang<sup>4</sup>, Chang Liu<sup>2</sup>, Yue Li<sup>2</sup>, Chengmei Shi<sup>2</sup>, Yongzheng Han<sup>2</sup>, Xiangyang Guo<sup>2</sup>, Wenchao Zhang<sup>1\*</sup>, Zhengqian Li<sup>2\*</sup>

# Yi Yuan and Yanan Song contributed equally to this study.

\* Zhengqian Li and Wenchao Zhang are co-correspondents for this article.

**Affiliations**

1. Department of Anesthesiology, Beijing Jishuitan Hospital, 31 Xijiekou East Street, Xicheng District, Beijing 100035, China.

2. Department of Anesthesiology, Peking University Third Hospital, No. 49, North Garden Street, Haidian District, Beijing, 100191 China.

3. Department of Orthopaedics & Traumatology, Beijing Jishuitan Hospital, 31 Xijiekou East Street, Xicheng District, Beijing 100035, China.

4. Research Center of Clinical Epidemiology, Peking University Third Hospital, No. 49, North Garden Street, Haidian District, Beijing, 100191 China.

**Correspondence**

Zhengqian Li,

Department of Anesthesiology

Peking University Third Hospital

Beijing, China, Tel: 8610-82267276; E-mail: [zhengqianli@bjmu.edu.cn](mailto:zhengqianli@bjmu.edu.cn)

Or

Wenchao Zhang

Department of Anesthesiology

1  
2  
3  
4  
5  
6  
7  
8  
9  
10  
11  
12  
13  
14  
15  
16  
17  
18  
19  
20  
21  
22  
23  
24  
25  
26  
27  
28  
29  
30  
31  
32  
33  
34  
35  
36  
37  
38  
39  
40  
41  
42  
43  
44  
45  
46  
47  
48  
49  
50  
51  
52  
53  
54  
55  
56  
57  
58  
59  
60

30 Beijing Jishuitan Hospital,  
31 Beijing, China, [Tel:8610-58516688-6907](tel:8610-58516688-6907); E-mail: [wenchaozhang116@163.com](mailto:wenchaozhang116@163.com)

32 **Word count**

33 **3328**

34

35

36

37

38

39

40

41

42

43

44

45

46

For peer review only

1  
2  
3  
4 47 **Effects of general versus regional anesthesia on circadian melatonin**  
5  
6 48 **rhythm and its association with postoperative delirium in elderly patients**  
7  
8  
9 49 **undergoing hip fracture surgery: study protocol for a prospective cohort**  
10  
11 50 **clinical trial**  
12  
13  
14

## 15 51 **Abstract**

16  
17  
18  
19 52 **Introduction:** Postoperative delirium (POD) is a common neurological  
20  
21  
22 53 complication after hip fracture surgery and is associated with high morbidity and  
23  
24 54 mortality in elderly patients. Although, the specific mechanism of POD remains unclear,  
25  
26  
27 55 circadian rhythm disruptions have recently drawn increased attention. To date, only  
28  
29  
30 56 limited postoperative time points of plasma melatonin level measurements were  
31  
32 57 recorded in previous studies, and such data cannot represent a comprehensive  
33  
34  
35 58 melatonin rhythm. The process of anesthesia (either general anesthesia [GA] or regional  
36  
37  
38 59 anesthesia [RA]) is known to influence the melatonin rhythm. However, how these two  
39  
40  
41 60 anesthesia methods differently affect the postoperative melatonin rhythm is still  
42  
43 61 unknown. Therefore, we hypothesized that RA may attenuate disruption of the  
44  
45 62 melatonin rhythm, which might decrease the incidence of POD in elderly patients  
46  
47  
48 63 undergoing hip surgery.

49  
50  
51 64 **Methods and analysis:** In this prospective cohort clinical trial, 140 patients  
52  
53  
54 65 scheduled for hip fracture surgery will be divided into two groups to receive either GA  
55  
56  
57 66 or RA. The primary aim is to compare the circadian rhythm of melatonin secretion  
58  
59  
60 67 between the two groups and explore its association with the incidence of POD.

1  
2  
3  
4 68 **Ethics and dissemination:** The study is ethically approved by the Medical  
5  
6 69 Science Research Ethics Committees of Beijing Jishuitan Hospital (JLKS201901-04).  
7  
8  
9 70 The results of the study will be published in peer-reviewed international journals.  
10  
11

12  
13 71 **Trial registration number:** Chinese Clinical Trial Registry,  
14  
15 72 ChiCTR1900027393.  
16  
17

18  
19 73 **Keywords:** Postoperative delirium; Circadian rhythm; Melatonin; General  
20  
21 74 anesthesia; Regional anesthesia; Elderly patients.  
22  
23

## 24 75

### 26 76 **Strengths and limitations of this study**

27  
28  
29 77 (1) A major strength of this study is that to our knowledge, this is the first trial to  
30  
31 78 evaluate the effects of different anesthesia methods (RA and GA) on the circadian  
32  
33 79 rhythm of melatonin secretion and explore their association with POD in elderly  
34  
35 80 patients undergoing hip fracture surgery.  
36  
37

38  
39 81 (2) Both objective and subjective sleep quality are included in the current study. This  
40  
41 82 can provide a better and more comprehensive understanding of the connection  
42  
43 83 between circadian rhythms and anesthesia.  
44  
45

46  
47 84 (3) The limitation of trial is that melatonin is considered to be an optimal peripheral  
48  
49 85 biomarker of circadian timing, more biomarkers such as cytokines and genes  
50  
51 86 (peripheral clock gene) should be included.  
52  
53

54  
55 87 (4) Although we will record both subjective and objective sleep quality, such  
56  
57 88 measurements are incomplete, for example polysomnography is the gold standard  
58  
59  
60

1  
2  
3  
4 89 for diagnosis of sleep disorders.  
5

6 90 (5) Our study will be conducted until discharge from the hospital, which might be  
7  
8  
9 91 insufficient for delirium screening.  
10

## 11 12 13 92 **INTRODUCTION** 14

15  
16 93 Postoperative delirium (POD), a common neurological complication in elderly patients  
17  
18 94 undergoing hip fracture surgery (range, 4%–53%), is usually associated with increased  
19  
20 95 morbidity and mortality rates, long-term cognitive decline, and a heavier healthcare  
21  
22 96 economic burden.<sup>1-6</sup> Many studies have indicated that preoperative brain dysfunction  
23  
24 97 (frail brain) in elderly patients is a predisposing factor for POD<sup>7, 8</sup>, while the  
25  
26 98 perioperative change of neuroinflammatory markers (e.g., C-reactive protein and  
27  
28 99 interleukin-6), oxidative stressor markers (cortisol) and the crucial hormone  
29  
30 100 (melatonin) within elderly frail brain are the precipitating factor for POD.<sup>8,9</sup> However,  
31  
32 101 the specific mechanism of POD remains unclear.<sup>9,10</sup>  
33  
34 102 Circadian rhythm disruptions have recently drawn increased attention as a possible  
35  
36 103 mechanism of POD.<sup>10, 11</sup> Circadian rhythms refer to the behavioral and physiological  
37  
38 104 cycles that occur within a period of approximately 24 hours, including the sleep–wake  
39  
40 105 cycles, hormone secretion (e.g., melatonin), and core body temperature.<sup>12</sup> Among these  
41  
42 106 indicators, plasma melatonin is considered to be the best peripheral marker of  
43  
44 107 endogenous circadian rhythms.<sup>13-15</sup> Previous studies have revealed potential  
45  
46 108 correlations between plasma melatonin secretion disruption and POD.<sup>10, 16-20</sup>  
47  
48 109 Nevertheless, only limited postoperative time points (e.g., once a day) of plasma  
49  
50  
51  
52  
53  
54  
55  
56  
57  
58  
59  
60



1  
2  
3  
4 110 melatonin level measurements were recorded in those studies, and such data cannot  
5  
6 111 represent a comprehensive melatonin rhythm. Moreover, one study indicated that the  
7  
8  
9 112 urinary excretion of 6-sulfatoxymelatonin (6-SMT), the main metabolite of melatonin,  
10  
11 113 during delirium was associated with clinical subtypes of delirium (higher in hypoactive  
12  
13  
14 114 and lower in hyperactive delirium).<sup>21</sup> However, measuring the melatonin level in a urine  
15  
16  
17 115 sample instead of a plasma sample at only one time point is insufficient to describe the  
18  
19 116 real pattern of the melatonin rhythm in the acute phase of delirium. Therefore, the exact  
20  
21  
22 117 association between the melatonin rhythm and delirium requires further exploration.

23  
24  
25  
26 118 The process of anesthesia (either general anesthesia [GA] or regional anesthesia [RA])  
27  
28 119 is known to influence the circadian rhythms.<sup>22-24</sup> On one hand, GA is associated with  
29  
30  
31 120 unconsciousness similar to a dreamless sleep, which may strongly alter circadian  
32  
33  
34 121 rhythms through the use of drugs such as N-methyl-D-aspartate (NMDA) receptor  
35  
36 122 antagonists or gamma-aminobutyric acid (GABA) receptor agonists<sup>22, 25, 26</sup>. On the other  
37  
38  
39 123 hand, RA is more helpful in the relief of sleep disturbances after surgery than GA<sup>27</sup>,  
40  
41 124 which may result from better maintenance of the melatonin rhythm postoperatively.  
42  
43  
44 125 However, the effects of these two anesthesia methods on the postoperative melatonin  
45  
46 126 rhythm have not been compared. Therefore, we hypothesized that RA may attenuate  
47  
48  
49 127 disruption of the melatonin rhythm, which might decrease the incidence of POD in  
50  
51  
52 128 elderly patients undergoing hip surgery. In this report, we present the design of a  
53  
54  
55 129 prospective cohort clinical trial to compare the effects of GA versus RA on the circadian  
56  
57  
58  
59  
60

1  
2  
3  
4 130 rhythm of melatonin secretion and the incidence of POD in elderly patients undergoing  
5  
6 131 hip fracture surgery.  
7  
8  
9

## 10 132 **METHODS AND ANALYSIS**

### 11 12 13 133 **Trial design**

14  
15 134 This prospective cohort clinical trial is designed to compare the effects of GA and RA on  
16  
17  
18 135 the melatonin rhythm and incidence of POD. We aim to recruit 140 patients with hip  
19  
20 136 fracture ( $\geq 65$  years of age) who will be assigned to either the GA group (n = 70) or RA  
21  
22  
23 137 group (n = 70) depending on their individual situation and personal willingness as well  
24  
25  
26 138 as the preference of the anesthesiologists and surgeons. We will conduct the trial at the  
27  
28 139 Beijing Jishuitan Hospital in China. Figure 1 shows the flow chart of this study.  
29  
30

### 31 140 **Primary outcome**

32  
33 141 The primary outcome is to compare the circadian rhythm of melatonin secretion  
34  
35  
36 142 between the GA and RA groups and explore its association with the incidence of POD  
37  
38  
39 143 until discharge from the hospital.  
40

### 41 144 **Secondary outcomes**

42  
43  
44 145 The secondary outcomes are to compare the subtype and severity of POD, sleep quality,  
45  
46  
47 146 and pain until discharge from the hospital, and postoperative cognitive function at 6  
48  
49 147 months and 1 year after surgery between the GA and RA groups.  
50

### 51 148 **Ethics approval**

52  
53  
54 149 The study protocol has been approved by the Medical Science Research Ethics  
55  
56  
57 150 Committees of Beijing Jishuitan Hospital (JLKS201901-04). Written informed consent  
58  
59  
60

1  
2  
3  
4 151 will be obtained from each enrolled patient accompanied by at least one family member  
5  
6 152 or proxy. This study has been registered at the Chinese Clinical Trial Registry  
7  
8  
9 153 (ChiCTR1900027393).

10  
11  
12 154 **Eligibility criteria**

13  
14 155 ***Inclusion criteria***

15  
16  
17 156 Participants will be included if they meet the following criteria: age of  $\geq 65$  years,  
18  
19 157 hospital admission for surgical treatment of hip fracture, and American Society of  
20  
21  
22 158 Anesthesiologists (ASA) physical status classification of I to III.

23  
24 159 ***Exclusion criteria***

25  
26  
27 160 Patients who meet any of the following criteria will be excluded: Parkinson's disease,  
28  
29 161 dementia (including dementia cause by Parkinson's disease, Alzheimer's disease, or  
30  
31  
32 162 Lewy body dementia), a stroke within the prior 6 months or any other central nervous  
33  
34  
35 163 system disease, alcohol-related disorders, multiple trauma, preoperative delirium,  
36  
37 164 severe deafness or vision problems, communication difficulties, night shift duty, taking  
38  
39  
40 165 medication related to melatonin, a plan to be transferred to the intensive care unit  
41  
42  
43 166 postoperatively, and refusal to participate in the study or unexpected discharge.

44  
45 167 **Preoperative baseline data collection and evaluation**

46  
47  
48 168 Trained investigators who are blind to the patient grouping will evaluate the patients  
49  
50 169 and their medical charts to screen out potential participants according to the inclusion  
51  
52  
53 170 and exclusion criteria. Baseline data will be collected, including demographic data (e.g.,  
54  
55  
56 171 age, sex, race, education level, height, and weight), surgical diagnosis, comorbidities,  
57  
58  
59 172 medication history, surgical history, smoking and drinking status, and the results of  
60

1  
2  
3  
4 173 physical, laboratory, and instrumental examinations. We will also record the ASA  
5  
6 174 physical status classification. Specifically, preoperative cognitive scans will be  
7  
8  
9 175 performed using the Mini-Mental State Examination (MMSE) <sup>28</sup>; preoperative delirium  
10  
11 176 will be diagnosed with the Confusion Assessment Method (CAM) <sup>29,30</sup>; activities of daily  
12  
13 177 living and instrumental activities of daily living will be assessed with the Katz Index of  
14  
15 178 Independence in Activities of Daily Living <sup>31</sup>; sleep quality will be assessed by the  
16  
17 179 Pittsburgh Sleep Quality Index (PSQI) <sup>32</sup>; and pain intensity will be assessed using the  
18  
19 180 numerical rating scale (NRS) <sup>33</sup>.

### 181 **Preoperative management**

182 All individuals will be placed in a standard private room with a consistent light–dark  
183 cycle and room temperature, and the lights will be turned off between 21:00 and 06:00  
184 even at the time of blood sample collection. The participants will be requested to eat the  
185 same diet and refrain from alcohol, caffeine, and chocolate. Their activities will be  
186 restricted at night from 21:00 to 06:00, during which time they will be free from  
187 interference factors including noise, television, and mobile phones during the study  
188 period.

### 189 **Anesthesia and analgesia**

190 All patients will receive an ultrasound-guided fascia iliac block (a single injection of 30  
191 mL of 0.33% ropivacaine) after admission to the operating room. During the operation,  
192 the patients' eyes will be carefully covered with eye patches to avoid light effects.

193 In the GA group, standard GA will be administered to the patients. Anesthesia will be  
194 intravenously induced with propofol (or etomidate), an opiate (sufentanil or fentanyl),

1  
2  
3  
4 195 and a muscle relaxant (rocuronium or cisatracurium). Sevoflurane will be used for  
5  
6 196 anesthesia maintenance, remifentanyl for analgesia, and rocuronium or cisatracurium  
7  
8  
9 197 for muscle relaxation. Mechanical ventilation will be continued to keep the end-tidal  
10  
11  
12 198 carbon dioxide concentration at 35 to 40 mmHg, and the bispectral index will be  
13  
14 199 maintained between 40 and 60.

15  
16  
17 200 In the RA group, bupivacaine or ropivacaine will be used for spinal anesthesia or  
18  
19 201 combined spinal and epidural anesthesia at the L2-3 or L3-4 levels.

20  
21  
22 202 On the day of surgery, intraoperative parameters will be recorded, including the mean  
23  
24 203 arterial pressure, heart rate, bispectral index, start time, duration and type of anesthesia  
25  
26 204 and surgery, anesthetic drugs and doses, sedative doses, blood loss, fluid balance and  
27  
28 205 transfusion of blood or clotting products, complications, and adverse events.

29  
30  
31 206 For postoperative analgesia management, the patients will receive intravenous patient-  
32  
33 207 controlled analgesia (sufentanil 100 µg and ondansetron 8 mg mixed with normal saline  
34  
35 208 to a total volume of 100 mL).

### 36 37 38 39 40 209 **Postoperative management and follow-up**

41  
42  
43 210 All patients will be followed up twice a day until discharge from the hospital. The  
44  
45 211 investigators blind to grouping will record the total hospitalization cost, the in-hospital  
46  
47 212 length of stay, and the occurrence of postoperative complications during hospitalization.  
48  
49  
50 213 Long-term cognitive function will be assessed for 1 year after surgery.

#### 51 52 53 214 1. Delirium assessment

54  
55  
56 215 Delirium will be diagnosed using the CAM, and the subtype and severity of delirium  
57  
58 216 will be assessed by using the Memorial Delirium Assessment Scale<sup>34</sup>. Surveillance

1  
2  
3  
4 217 will involve twice-daily visits (8:00 and 20:00) by a trained geriatrician. The  
5  
6 218 duration of delirium will be measured as the number of days from onset of delirium  
7  
8  
9 219 symptoms to resolution of symptoms. If the researcher is in doubt regarding this  
10  
11  
12 220 assessment, the diagnosis of POD will be referred to an external expert.

13  
14 221 2. Sleep assessment

15  
16  
17 222 All participants will continuously wear a sleep tracker (Fitbit Charge 3; Fitbit, Inc.,  
18  
19 223 San Francisco, CA, USA), which is an available and inexpensive method to quantify  
20  
21  
22 224 sleep patterns <sup>35</sup>. The investigators will provide instructions on wearing the sleep  
23  
24  
25 225 tracker, a mobile device capable of downloading Fitbit Connect software, and  
26  
27 226 completing the corresponding sleep logs (bedtime, wake time, and nap times). The  
28  
29  
30 227 frequency of syncing will be checked by the research staff weekly, and the Fitbit  
31  
32  
33 228 Charge proprietary algorithm will process the sensor data to automate the sleep  
34  
35 229 variables <sup>36</sup>. All patients will wear sleep tracker until discharge from hospital. Based  
36  
37  
38 230 on the data from the sleep tracker, sleep logs, and direct observation by a third party,  
39  
40 231 we will derive the following data: total sleep time (min), sleep onset latency (min),  
41  
42  
43 232 wake time after sleep onset (min), time in rapid eye movement sleep , and time spent  
44  
45 233 in “light sleep” and “deep sleep” (according to Fitbit Inc.). Subjective sleep quality  
46  
47  
48 234 will be assessed with an NRS (0 = worst sleep and 10 = best sleep) <sup>37</sup>.

49  
50 235 3. The intensity of postoperative pain both at rest and with movement will be evaluated  
51  
52  
53 236 twice daily with the NRS.

54  
55  
56 237 4. Cognitive function will be assessed by the same geriatrician at 6 months and 1 year  
57  
58  
59 238 after surgery. The Modified Telephone Interview for Cognitive Status will be used to  
60

1  
2  
3  
4 239 test the patient's cognitive function in non-face-to-face interviews <sup>37</sup>.

5  
6  
7 240 **Blinding**

8  
9 241 An investigator will be assigned to preserve and distribute randomization results.

10  
11 242 Investigators were not blinded to the study group assignment, but the trained

12  
13 243 geriatrician responsible for postoperative evaluation including POD diagnosis, as well

14  
15 244 as PSQI, IADLs, and NRS scores are blinded to the grouping.

16  
17  
18  
19 245 **Light exposure**

20  
21 246 Considering that light suppresses melatonin secretion except in life-threatening

22  
23 247 situations, only illumination from a penlight will be used during these interventions <sup>15</sup>,

24  
25 248 <sup>19</sup>. Blood sample collection and nursing interventions at night will be performed with a

26  
27 249 penlight to avoid light exposure. Light intensity readings will be obtained with a digital

28  
29 250 meter to ensure that light exposure does not exceed 10 lux.

30  
31  
32  
33 251 **Sample Collection**

34  
35 252 Usually, the melatonin concentration is low throughout the day and then rises to a peak

36  
37 253 between 02:00 and 04:00 <sup>15</sup>. To establish the circadian rhythm, the plasma

38  
39 254 concentration of melatonin will be measured at least four times a day <sup>15, 19</sup>. Postoperative

40  
41 255 blood samples will be dynamically collected every day at 04:00, 10:00, 16:00, and 22:00

42  
43 256 until the patient discharged through venipuncture in the heparinized tube (2 ml per

44  
45 257 sample) <sup>16, 19</sup>. The samples will be stored at 4°C and brought to the laboratory in a

46  
47 258 nitrogen canister, where they will be stored at -80°C. The concentration of melatonin

48  
49 259 will be measured with the enzyme immunoassay method (cat no. RE 54021; IBL

50  
51  
52  
53  
54  
55  
56  
57  
58 260 International GmbH, Hamburg, Germany) with a limit of detection of 1.6 pg/mL <sup>38</sup>.

## 261 **Sample size estimation**

262 Melatonin is secreted in a biphasic pattern in which nighttime secretion increases from  
263 20:00 to 22:00 with a peak at 02:00 to 04:00, and daytime secretion decreases from  
264 06:00 to 08:00 with a nadir at 12:00<sup>14, 39</sup>. Cronin et al.<sup>15</sup> researched the nighttime  
265 melatonin secretion of adult patients for 3 days after gynecologic surgery and found that  
266 the lowest level occurred on the first night postoperatively. In another study of elderly  
267 patients undergoing major abdominal surgery, Shigeta et al.<sup>40</sup> found that the  
268 postoperative amplitude of nighttime melatonin secretion was significantly lower than  
269 the preoperative amplitude. These findings indicate that the peak of melatonin secretion  
270 is suppressed to the greatest degree in the first postoperative night, possibly leading to  
271 a melatonin rhythm shift. Therefore, for the present study, we will choose 04:00 on the  
272 first postoperative night as the time point for comparing the melatonin concentration  
273 between the groups. Our pilot study showed that the mean  $\pm$  standard deviation of  
274 melatonin was  $10.5 \pm 4.0$  and  $13.4 \pm 6.9$  pg/mL in the GA and RA groups (n=15 in each  
275 group), respectively. Using a two-sided  $\alpha$  value of 0.05 and 85% power and considering  
276 a 10% dropout rate, we plan to include 140 patients in this study, with 70 patients in  
277 each group (1:1).

## 278 **Circadian melatonin rhythm data**

279 Circadian markers of the melatonin rhythm, including the mesor (mean concentration)  
280 and amplitude (peak value minus the mean value), acrophase time (peak time), will be  
281 calculated by Chronos-Fit program data and cosinor software<sup>41</sup>. The area under the  
282 curve (AUC) will be calculated as a measure of the secreted amount of melatonin with



1  
2  
3  
4 283 the trapezoidal method. The data will be subsequently smoothed with the Lowess  
5  
6 284 (Cleveland) curve-fitting procedure curve-fitting procedure <sup>42</sup>.

### 285 **Statistical analysis**

286 Case report forms will be used for data collection. Demographic data and information  
287 on pain scores, delirium and sleep assessment data, and adverse events during and after  
288 surgery will be recorded. Data will be presented as mean and standard deviation,  
289 median and interquartile range (25th–75th percentile), or frequency and proportion  
290 depending on the variable type and distribution. Categorical variables will be assessed  
291 with the  $\chi^2$  test or Fisher's exact test. Differences in continuous variables between the  
292 groups will be assessed with a parametric *t*-test, the Wilcoxon rank-sum test, or the  
293 Kruskal–Wallis test. The Mann–Whitney U test will be used to analyze non-normal  
294 variables. Results will be presented with 95% confidence intervals. A *P* value of <0.05  
295 will be considered statistically significant. All statistical analyses will be performed with  
296 SPSS software, version 21.0 (IBM Corp., Armonk, NY, USA).

### 297 **DISCUSSION**

298 This clinical trial is designed to test whether RA can relieve perioperative melatonin  
299 rhythm disruption compared with GA and decrease the incidence of POD in elderly  
300 patients with hip fracture.

301 Although some previous studies have shown connections between melatonin secretion  
302 disruption and delirium, few have elucidated the real melatonin rhythm pattern <sup>43-45</sup>.  
303 For example, a prospective observational study by Yoshitaka et al. showed that the delta  
304 plasma melatonin concentration (calculated based on the preoperative and

1  
2  
3  
4 305 postoperative values at selected time points) at 1 hour after surgery was significantly  
5  
6 306 lower in patients with than without delirium <sup>46</sup>. Melatonin secretion exhibits a biphasic  
7  
8  
9 307 pattern in which daytime secretion is low (5 pg/mL on average) and nighttime secretion  
10  
11 308 is relatively high (50–100 pg/ml) <sup>14, 39</sup>. However, the sample collection time points of  
12  
13  
14 309 melatonin in the above-mentioned study (before the operation, 1 hour after the  
15  
16  
17 310 operation, and at 08:00 on postoperative days 1 and 2) represented either nighttime  
18  
19 311 secretion on the operation day or daytime secretion on the postoperative days; thus, the  
20  
21  
22 312 measurements do not represent the comprehensive rhythm of melatonin. In contrast,  
23  
24  
25 313 in the current study the blood samples will be taken before anesthesia, postoperative  
26  
27 314 blood samples (melatonin) every day at 04:00, 10:00, 16:00 and 22:00 until discharge.  
28  
29  
30 315 These measurements are adequate to establish a melatonin rhythm curve. They will not  
31  
32 316 only show the individual postoperative melatonin concentrations but also allow us to  
33  
34  
35 317 analyze the irregular pattern of melatonin secretion in patients with delirium.  
36  
37  
38 318 Previous trials have shown that GA may influence postoperative melatonin secretion <sup>22-</sup>  
39  
40 319 <sup>24</sup>. First, in patients who received combined intravenous and inhaled anesthesia, the  
41  
42  
43 320 melatonin levels decreased the first night after surgery <sup>24, 47</sup>. Second, GA by inhalation  
44  
45  
46 321 was associated with a significant decrease in the melatonin concentration on the night  
47  
48 322 of surgery, and this decrease was 350% greater than that on the third night after surgery  
49  
50  
51 323 <sup>15</sup>. Third, total intravenous anesthesia induced a phase delay in the 6-SMT rhythm; the  
52  
53 324 peak time was late by about 1 hour, and the amplitude of the melatonin rhythm  
54  
55  
56 325 decreased by 85% on the night of surgery <sup>12</sup>. In contrast, another study demonstrated  
57  
58 326 that RA was helpful to relieve sleep disturbance after surgery <sup>27</sup>, which may result from  
59  
60

1  
2  
3  
4 327 better maintenance of the melatonin rhythm postoperatively. However, little is known  
5  
6 328 about how the two anesthesia methods differently affect the melatonin rhythm. Karkela  
7  
8  
9 329 et al. <sup>24</sup> conducted a similar clinical study and found that anesthesia and surgery  
10  
11 330 disturbed the circadian melatonin rhythm, but there was no significant difference in the  
12  
13  
14 331 melatonin secretion between the spinal anesthesia and GA groups for minor orthopedic  
15  
16  
17 332 operations <sup>24</sup>. We do not consider that these results are especially robust and  
18  
19 333 generalizable because of several limitations of the trial, such as the small sample size  
20  
21  
22 334 (40 participants), measurement of only the saliva and urine concentrations of  
23  
24  
25 335 melatonin (no plasma or serum concentrations), and insufficient melatonin  
26  
27 336 measurement timing (measurement of only nighttime secretion levels). We hypothesize  
28  
29  
30 337 that RA can maintain an almost normal melatonin rhythm for the following two reasons.  
31  
32 338 First, RA may significantly reduce the types and amounts of general anesthetics used  
33  
34  
35 339 compared with GA, which can strongly alter melatonin secretion through different  
36  
37  
38 340 signal pathways. Second, RA allows better pain control and improved sleep quality  
39  
40  
41 341 compared with GA, which further facilitates a decrease in the severity of melatonin  
42  
43 342 rhythm disruption.

## 343 **CONCLUSION**

344 In conclusion, to our knowledge, this is the first study to compare the circadian rhythm  
345 of melatonin secretion between GA and RA groups and to explore the potential  
346 association between circadian rhythm disruptions and the development of delirium.  
347 Our findings will promote a greater understanding of delirium pathophysiology and  
348 provide clinical evidence for the optimal anesthesia method in elderly patients

1  
2  
3  
4 349 undergoing hip fracture surgery.  
5

6  
7 350 **Declarations**

8  
9 351 The results of the study will be published in peer-reviewed international journals and will be  
10  
11 352 presented at national and international conferences and symposiums.  
12

13  
14 353 **Acknowledgments:** Not applicable  
15  
16

17 354 **Supplementary Material**

18  
19  
20 355 **Contributors:** YS and YY are joint first authors. ZL and XG obtained funding. XG, ZL and GW  
21  
22 356 designed the study. YS, YY, YJ and WZ collected the data. LY and YC were involved in data  
23  
24 357 cleaning, mortality follow-up, and verification. JL, CY, and DS analyzed the data. YS, YY and ZL  
25  
26 358 drafted the manuscript. WZ contributed to the interpretation of the results and critical revision  
27  
28 359 of the manuscript for important intellectual content and approved the final version of the  
29  
30 360 manuscript. All authors have read and approved the final manuscript. ZL and WZ are the study  
31  
32 361 guarantors.  
33  
34  
35  
36  
37

38 362 **Funding:** This research is supported by the National Natural Science Foundation of China  
39  
40 363 (81971012 and 81873726), Key Clinical Projects of Peking University Third Hospital  
41  
42 364 (BYSYZD2019027), and Peking University “Clinical Medicine plus X” Youth Project  
43  
44 365 (PKU2020LCXQ016).  
45  
46  
47  
48  
49

50 366 **Competing interests:** The authors declare that they have no competing interests.  
51  
52

53 367 **Patient consent:** Obtained.  
54  
55  
56  
57  
58  
59  
60

1  
2  
3  
4 368 **Ethics approval:** The study was approved by the research ethics board of  
5  
6 369 Beijing Jishuitan Hospital (JLKS201901-04). All participants and their caregivers will provide  
7  
8  
9 370 written consent to participate in the study.  
10

11  
12  
13 371 **Data sharing:** No additional data are available.  
14  
15

## 16 372 **References**

- 17  
18  
19 373 1. Sieber FE, Neufeld KJ, Gottschalk A, *et al.* Effect of Depth of Sedation in Older Patients  
20  
21 374 Undergoing Hip Fracture Repair on Postoperative Delirium: The STRIDE Randomized  
22  
23 375 Clinical Trial. *JAMA Surg.* 2018; 153(11):987-995.  
24  
25  
26  
27 376 2. Bruce AJ, Ritchie CW, Blizard R, *et al.* The incidence of delirium associated with  
28  
29 377 orthopedic surgery: a meta-analytic review. *Int Psychogeriatr.* 2007; 19(2):197-214.  
30  
31  
32 378 3. Su X, Meng ZT, Wu XH, *et al.* Dexmedetomidine for prevention of delirium in elderly  
33  
34 379 patients after non-cardiac surgery: a randomised, double-blind, placebo-controlled trial.  
35  
36  
37 380 *The Lancet.* 2016; 388(10054):1893-1902.  
38  
39  
40 381 4. Inouye SK, Westendorp RGJ, Saczynski JS. Delirium in elderly people. *The Lancet.* 2014;  
41  
42 382 383(9920):911-922.  
43  
44  
45 383 5. Wildes TS, Mickle AM, Ben Abdallah A, *et al.* Effect of Electroencephalography-Guided  
46  
47 384 Anesthetic Administration on Postoperative Delirium Among Older Adults Undergoing  
48  
49 385 Major Surgery: The ENGAGES Randomized Clinical Trial. *JAMA.* 2019; 321(5):473-483.  
50  
51  
52  
53 386 6. Leslie DL, Marcantonio ER, Zhang Y, *et al.* One-year health care costs associated with  
54  
55 387 delirium in the elderly population. *Arch Intern Med.* 2008; 168(1):27-32.  
56  
57  
58 388 7. Aldecoa C, Bettelli G, Bilotta F, *et al.* European Society of Anaesthesiology evidence-

- 1  
2  
3  
4 389 based and consensus-based guideline on postoperative delirium. *Eur J Anaesthesiol.*  
5  
6 390 2017; 34(4):192-214.  
7  
8  
9 391 8. Maldonado JR. Delirium pathophysiology: An updated hypothesis of the etiology of  
10  
11 392 acute brain failure. *International journal of geriatric psychiatry.* 2018; 33(11):1428-1457.  
12  
13  
14 393 9. Marcantonio ER, Rudolph JL, Culley D, *et al.* Serum biomarkers for delirium. *J Gerontol*  
15  
16 394 *A Biol Sci Med Sci.* 2006; 61(12):1281-1286.  
17  
18  
19 395 10. Maldonado JR. Neuropathogenesis of delirium: review of current etiologic theories and  
20  
21 396 common pathways. *Am J Geriatr Psychiatry.* 2013; 21(12):1190-1222.  
22  
23  
24 397 11. Scott BK. Disruption of Circadian Rhythms and Sleep in Critical Illness and its Impact  
25  
26 398 on the Development of Delirium. *Curr Pharm Design.* 2015; 21(24):3443-3452.  
27  
28  
29 399 12. Gogenur I, Middleton B, Kristiansen VB, *et al.* Disturbances in melatonin and core body  
30  
31 400 temperature circadian rhythms after minimal invasive surgery. *Acta anaesthesiologica*  
32  
33 401 *Scandinavica.* 2007; 51(8):1099-1106.  
34  
35  
36 402 13. Tordjman S, Chokron S, Delorme R, *et al.* Melatonin: Pharmacology, Functions and  
37  
38 403 Therapeutic Benefits. *Curr Neuropharmacol.* 2017; 15(3):434-443.  
39  
40  
41 404 14. Brzezinski A. Melatonin in humans. *N Engl J Med.* 1997; 336(3):186-195.  
42  
43  
44 405 15. Cronin AJ, Keifer JC, Davies MF, *et al.* Melatonin secretion after surgery. *Lancet.* 2000;  
45  
46 406 356(9237):1244-1245.  
47  
48  
49 407 16. Olofsson K, Alling C, Lundberg D, *et al.* Abolished circadian rhythm of melatonin  
50  
51 408 secretion in sedated and artificially ventilated intensive care patients. *Acta*  
52  
53 409 *anaesthesiologica Scandinavica.* 2004; 48(6):679-684.  
54  
55  
56 410 17. Miyazaki T, Kuwano H, Kato H, *et al.* Correlation between serum melatonin circadian  
57  
58  
59  
60

- 1  
2  
3  
4 411 rhythm and intensive care unit psychosis after thoracic esophagectomy. *Surgery*. 2003;  
5  
6 412 133(6):662-668.  
7  
8  
9 413 18. Scholtens RM, van Munster BC, van Faassen M, *et al*. Plasma melatonin levels in hip  
10  
11 414 fracture patients with and without delirium: A confirmation study. *Mech Ageing Dev*.  
12  
13 415 2017; 167:1-4.  
14  
15  
16 416 19. Piotrowicz K, Klich-Raczka A, Pac A, *et al*. The diurnal profile of melatonin during  
17  
18 417 delirium in elderly patients--preliminary results. *Exp Gerontol*. 2015; 72:45-49.  
19  
20  
21 418 20. Fitzgerald JM, Adamis D, Trzepacz PT, *et al*. Delirium: a disturbance of circadian  
22  
23 419 integrity? *Med Hypotheses*. 2013; 81(4):568-576.  
24  
25  
26 420 21. Balan S, Leibovitz A, Zila SO, *et al*. The relation between the clinical subtypes of delirium  
27  
28 421 and the urinary level of 6-SMT. *J Neuropsychiatry Clin Neurosci*. 2003; 15(3):363-366.  
29  
30  
31 422 22. Coppola S, Caccioppola A, Chiumello D. Internal clock and the surgical ICU patient.  
32  
33 423 Current opinion in anaesthesiology. 2019; 33(2):177-184.  
34  
35  
36 424 23. Poulsen RC, Warman GR, Sleight J, *et al*. How does general anaesthesia affect the  
37  
38 425 circadian clock? *Sleep Med Rev*. 2018; 37:35-44.  
39  
40  
41 426 24. Karkela J, Vakkuri O, Kaukinen S, *et al*. The influence of anaesthesia and surgery on the  
42  
43 427 circadian rhythm of melatonin. *Acta anaesthesiologica Scandinavica*. 2002; 46(1):30-36.  
44  
45  
46 428 25. Dispersyn G, Pain L, Challet E, *et al*. General anesthetics effects on circadian temporal  
47  
48 429 structure: an update. *Chronobiol Int*. 2008; 25(6):835-850.  
49  
50  
51 430 26. Guo XY, Kuzumi E, Charman SC, *et al*. Perioperative melatonin secretion in patients  
52  
53 431 undergoing coronary artery bypass grafting. *Anesth Analg*. 2002; 94(5):1085-1091.  
54  
55  
56 432 27. Kjolhede P, Langstrom P, Nilsson P, *et al*. The impact of quality of sleep on recovery  
57  
58  
59  
60

- 1  
2  
3  
4 433 from fast-track abdominal hysterectomy. *J Clin Sleep Med.* 2012; 8(4):395-402.  
5  
6 434 28. Girard TD, Thompson JL, Pandharipande PP, *et al.* Clinical phenotypes of delirium  
7  
8 435 during critical illness and severity of subsequent long-term cognitive impairment: a  
9  
10 436 prospective cohort study. *Lancet Respir Med.* 2018; 6(3):213-222.  
11  
12  
13  
14 437 29. Evered L, Silbert B, Knopman DS, *et al.* Recommendations for the nomenclature of  
15  
16 438 cognitive change associated with anaesthesia and surgery-2018. *Br J Anaesth.* 2018;  
17  
18 439 121(5):1005-1012.  
19  
20  
21  
22 440 30. Palanca BJA, Wildes TS, Ju YS, *et al.* Electroencephalography and delirium in the  
23  
24 441 postoperative period. *Br J Anaesth.* 2017; 119(2):294-307.  
25  
26  
27 442 31. Katz S, Ford AB, Moskowitz RW, *et al.* STUDIES OF ILLNESS IN THE AGED. THE  
28  
29 443 INDEX OF ADL: A STANDARDIZED MEASURE OF BIOLOGICAL AND  
30  
31 444 PSYCHOSOCIAL FUNCTION. *JAMA.* 1963; 185(12):914-919.  
32  
33  
34  
35 445 32. Buysse DJ, Reynolds CF, Monk TH, *et al.* The Pittsburgh Sleep Quality Index - a New  
36  
37 446 Instrument for Psychiatric Practice and Research. *Psychiat Res.* 1989; 28(2):193-213.  
38  
39  
40 447 33. Bahreini M, Jalili M, Moradi-Lakeh M. A Comparison of Three Self-Report Pain Scales  
41  
42 448 in Adults with Acute Pain. *J Emerg Med.* 2015; 48(1):10-18.  
43  
44  
45 449 34. Gross AL, Tommet D, D'Aquila M, *et al.* Harmonization of delirium severity instruments:  
46  
47 450 a comparison of the DRS-R-98, MDAS, and CAM-S using item response theory. *BMC*  
48  
49 451 *Med Res Methodol.* 2018; 18(1):92.  
50  
51  
52  
53 452 35. de Zambotti M, Goldstone A, Claudatos S, *et al.* A validation study of Fitbit Charge 2™  
54  
55 453 compared with polysomnography in adults. *Chronobiol Int.* 2018; 35(4):465-476.  
56  
57  
58 454 36. Castner J, Mammen MJ, Jungquist CR, *et al.* Validation of fitness tracker for sleep  
59  
60



- 1  
2  
3  
4 455 measures in women with asthma. *J Asthma*. 2019; 56(7):719-730.  
5  
6 456 37. Zhang Y, Li HJ, Wang DX, et al. Impact of inhalational versus intravenous anaesthesia  
7  
8  
9 457 on early delirium and long-term survival in elderly patients after cancer surgery: study  
10  
11 458 protocol of a multicentre, open-label, and randomised controlled trial. *BMJ Open*. 2017;  
12  
13 459 7(11):e018607.  
14  
15  
16 460 38. Kennaway DJ. A critical review of melatonin assays: Past and present. *J Pineal Res*, 2019;  
17  
18 461 67(1): e12572.  
19  
20  
21 462 39. Rzepka-Migut B, Paprocka J. Melatonin-Measurement Methods and the Factors  
22  
23 463 Modifying the Results. A Systematic Review of the Literature. *Int J Environ Res Public*  
24  
25 464 *Health* 2020, 17(6):1916.  
26  
27  
28 465 40. Shigeta H, Yasui A, Nimura Y, et al. Postoperative delirium and melatonin levels in  
29  
30 466 elderly patients. *Am J Surg*. 2001; 182(5):449-454.  
31  
32  
33 467 41. Song J, Chu SS, Cui Y, et al. Circadian rhythm resynchronization improved isoflurane-  
34  
35 468 induced cognitive dysfunction in aged mice. *Exp Neurol*. 2018; 306:45-54.  
36  
37  
38 469 42. Cleveland WS. Robust Locally Weighted Regression and Smoothing Scatterplots. *J Am*  
39  
40 470 *Stat Assoc*. 1979; 74(368):829-836.  
41  
42  
43 471 43. Lu Y, Li YW, Wang L, et al. Promoting sleep and circadian health may prevent  
44  
45 472 postoperative delirium: A systematic review and meta-analysis of randomized clinical  
46  
47 473 trials. *Sleep Med Rev*. 2019; 48:101207.  
48  
49  
50 474 44. FitzGerald JM, O'Regan N, Adamis D, et al. Sleep-wake cycle disturbances in elderly  
51  
52 475 acute general medical inpatients: Longitudinal relationship to delirium and dementia.  
53  
54 476 *Alzheimers Dement (Amst)*. 2017; 7:61-68.  
55  
56  
57  
58  
59  
60

- 1  
2  
3  
4 477 45. Yousaf F, Seet E, Venkatraghavan L, et al. Melatonin and postoperative delirium: a  
5  
6 478 possible link? *Can J Anaesth.* 2010; 57(8):794-795.  
7  
8  
9 479 46. Yoshitaka S, Egi M, Morimatsu H, et al. Perioperative plasma melatonin concentration  
10  
11 480 in postoperative critically ill patients: its association with delirium. *J Crit Care.* 2013;  
12  
13 481 28(3):236-242.  
14  
15  
16 482 47. Ram E, Vishne TH, Weinstein T, et al. General anesthesia for surgery influences  
17  
18 483 melatonin and cortisol levels. *World J Surg.* 2005; 29(7):826-829.  
19  
20  
21  
22 484  
23  
24  
25 485  
26  
27 486  
28  
29  
30 487  
31  
32 488  
33  
34  
35 489  
36  
37 490  
38  
39  
40 491  
41  
42 492  
43  
44  
45 493  
46  
47  
48 494  
49  
50  
51 495  
52  
53 496  
54  
55  
56 497  
57  
58 498  
59  
60

1  
2  
3  
4 499

5  
6 500

7  
8  
9 501

10  
11 502

12  
13  
14 503 **Figuer legend**

15  
16  
17 504 **Figure 1 Flow chart of the trial.** ASA, American Society of Anesthesiologists; CAM,

18  
19 505 Confusion Assessment Method; MMSE, Mini-Mental State Examination; ADL,

20  
21 506 activities of daily living; PSQI, Pittsburgh Sleep Quality Index; IL, interleukin; CRP, C-

22  
23 507 reactive protein; Cor, cortisol; MAP, mean arterial pressure; HR, heart rate; BIS,

24  
25 508 bispectral index; MDAS, Memorial Delirium Assessment Scale; TICS-m, Modified

26  
27 509 telephone interview for cognitive status.

28  
29  
30  
31  
32 510

33  
34  
35  
36  
37  
38  
39  
40  
41  
42  
43  
44  
45  
46  
47  
48  
49  
50  
51  
52  
53  
54  
55  
56  
57  
58  
59  
60

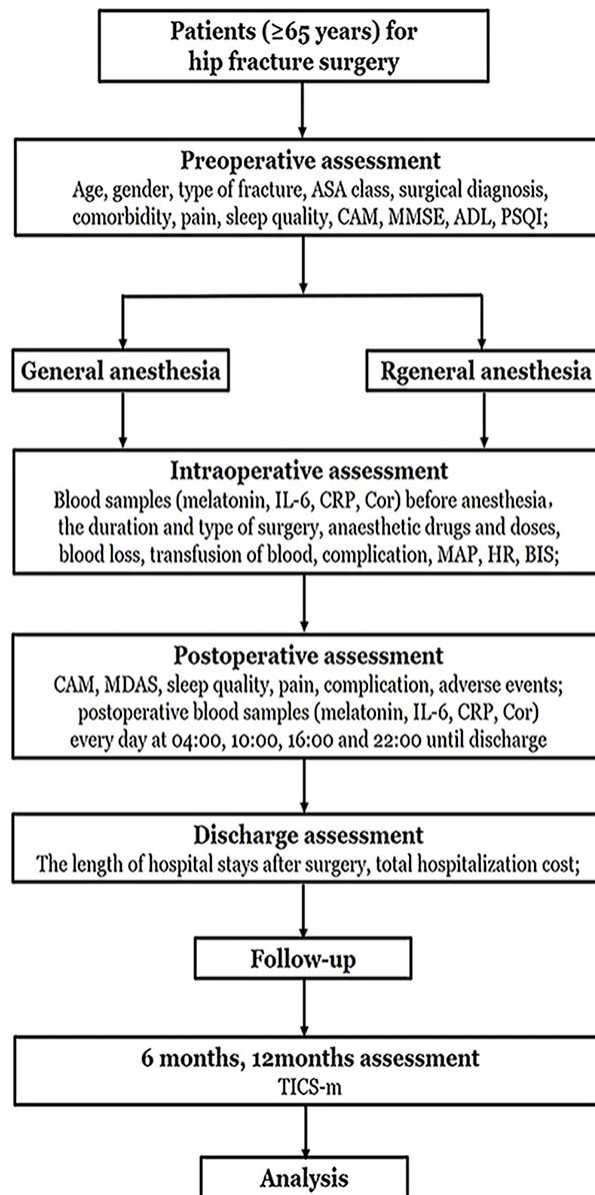

Figure 1

50x101mm (300 x 300 DPI)

# BMJ Open

## Effects of general versus regional anesthesia on circadian melatonin rhythm and its association with postoperative delirium in elderly patients undergoing hip fracture surgery: study protocol for a prospective cohort clinical trial

|                                 |                                                                                                                                                                                                                                                                                                                                                                                                                                                                                                                                                                                                                                                                                                                                                                                                                                                                 |
|---------------------------------|-----------------------------------------------------------------------------------------------------------------------------------------------------------------------------------------------------------------------------------------------------------------------------------------------------------------------------------------------------------------------------------------------------------------------------------------------------------------------------------------------------------------------------------------------------------------------------------------------------------------------------------------------------------------------------------------------------------------------------------------------------------------------------------------------------------------------------------------------------------------|
| Journal:                        | <i>BMJ Open</i>                                                                                                                                                                                                                                                                                                                                                                                                                                                                                                                                                                                                                                                                                                                                                                                                                                                 |
| Manuscript ID                   | bmjopen-2020-043720.R1                                                                                                                                                                                                                                                                                                                                                                                                                                                                                                                                                                                                                                                                                                                                                                                                                                          |
| Article Type:                   | Protocol                                                                                                                                                                                                                                                                                                                                                                                                                                                                                                                                                                                                                                                                                                                                                                                                                                                        |
| Date Submitted by the Author:   | 21-Dec-2020                                                                                                                                                                                                                                                                                                                                                                                                                                                                                                                                                                                                                                                                                                                                                                                                                                                     |
| Complete List of Authors:       | Yuan, Yi; Beijing Jishuitan Hospital<br>Song, Yanan; Peking University Third Hospital, Department of Anesthesiology<br>Wang, Geng; Beijing Jishuitan Hospital, Department of Anesthesiology<br>Jia, Yunyang; Beijing Jishuitan Hospital<br>zhou, Yang; Peking University Third Hospital<br>Mi, Xinning; Peking University Third Hospital<br>Jia, Xixi; Peking University Third Hospital<br>Wang, Xiaoxiao; Peking University Third Hospital, Research Center of Clinical Epidemiology<br>Liu, Chang; Peking University Third Hospital<br>Li, Yue ; Peking University Third Hospital<br>Shi, Chengmei; Peking University Third Hospital<br>Han, Yongzheng; Peking University Third Hospital, Anesthesiology<br>Guo, Xiangyang; Peking University Third Hospital<br>Zhang, Wenchao; Beijing Jishuitan Hospital<br>Li, Zhengqian; Peking University Third Hospital |
| <b>Primary Subject Heading</b>: | Anaesthesia                                                                                                                                                                                                                                                                                                                                                                                                                                                                                                                                                                                                                                                                                                                                                                                                                                                     |
| Secondary Subject Heading:      | Neurology                                                                                                                                                                                                                                                                                                                                                                                                                                                                                                                                                                                                                                                                                                                                                                                                                                                       |
| Keywords:                       | Anaesthesia in orthopaedics < ANAESTHETICS, Delirium & cognitive disorders < PSYCHIATRY, Adult anaesthesia < ANAESTHETICS                                                                                                                                                                                                                                                                                                                                                                                                                                                                                                                                                                                                                                                                                                                                       |
|                                 |                                                                                                                                                                                                                                                                                                                                                                                                                                                                                                                                                                                                                                                                                                                                                                                                                                                                 |

SCHOLARONE™  
Manuscripts

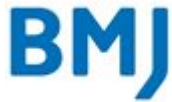

I, the Submitting Author has the right to grant and does grant on behalf of all authors of the Work (as defined in the below author licence), an exclusive licence and/or a non-exclusive licence for contributions from authors who are: i) UK Crown employees; ii) where BMJ has agreed a CC-BY licence shall apply, and/or iii) in accordance with the terms applicable for US Federal Government officers or employees acting as part of their official duties; on a worldwide, perpetual, irrevocable, royalty-free basis to BMJ Publishing Group Ltd ("BMJ") its licensees and where the relevant Journal is co-owned by BMJ to the co-owners of the Journal, to publish the Work in this journal and any other BMJ products and to exploit all rights, as set out in our [licence](#).

The Submitting Author accepts and understands that any supply made under these terms is made by BMJ to the Submitting Author unless you are acting as an employee on behalf of your employer or a postgraduate student of an affiliated institution which is paying any applicable article publishing charge ("APC") for Open Access articles. Where the Submitting Author wishes to make the Work available on an Open Access basis (and intends to pay the relevant APC), the terms of reuse of such Open Access shall be governed by a Creative Commons licence – details of these licences and which [Creative Commons](#) licence will apply to this Work are set out in our licence referred to above.

Other than as permitted in any relevant BMJ Author's Self Archiving Policies, I confirm this Work has not been accepted for publication elsewhere, is not being considered for publication elsewhere and does not duplicate material already published. I confirm all authors consent to publication of this Work and authorise the granting of this licence.

**Title**

Effects of general versus regional anesthesia on circadian melatonin rhythm and its association with postoperative delirium in elderly patients undergoing hip fracture surgery: study protocol for a prospective cohort clinical trial

**Author**

Yi Yuan<sup>1#</sup>, Yanan Song<sup>2#</sup>, Geng Wang<sup>1</sup>, Yunyang Jia<sup>3</sup>, Yang Zhou<sup>2</sup>, Xinning Mi<sup>2</sup>, Xixi Jia<sup>2</sup>, Xiaoxiao Wang<sup>4</sup>, Chang Liu<sup>2</sup>, Yue Li<sup>2</sup>, Chengmei Shi<sup>2</sup>, Yongzheng Han<sup>2</sup>, Xiangyang Guo<sup>2</sup>, Wenchao Zhang<sup>1\*</sup>, Zhengqian Li<sup>2\*</sup>

# Yi Yuan and Yanan Song contributed equally to this study.

\* Zhengqian Li and Wenchao Zhang are co-correspondents for this article.

**Affiliations**

1. Department of Anesthesiology, Beijing Jishuitan Hospital, 31 Xijiekou East Street, Xicheng District, Beijing 100035, China.

2. Department of Anesthesiology, Peking University Third Hospital, No. 49, North Garden Street, Haidian District, Beijing, 100191, China.

3. Department of Orthopaedics & Traumatology, Beijing Jishuitan Hospital, 31 Xijiekou East Street, Xicheng District, Beijing 100035, China.

4. Research Center of Clinical Epidemiology, Peking University Third Hospital, No. 49, North Garden Street, Haidian District, Beijing, 100191, China.

**Correspondence**

Zhengqian Li,

Department of Anesthesiology

Peking University Third Hospital

Beijing, China, Tel: 8610-82267276; E-mail: [zhengqianli@bjmu.edu.cn](mailto:zhengqianli@bjmu.edu.cn)

Or

Wenchao Zhang

Department of Anesthesiology

1  
2  
3  
4  
5  
6  
7  
8  
9  
10  
11  
12  
13  
14  
15  
16  
17  
18  
19  
20  
21  
22  
23  
24  
25  
26  
27  
28  
29  
30  
31  
32  
33  
34  
35  
36  
37  
38  
39  
40  
41  
42  
43  
44  
45  
46  
47  
48  
49  
50  
51  
52  
53  
54  
55  
56  
57  
58  
59  
60

30 Beijing Jishuitan Hospital,  
31 Beijing, China, Tel:8610-58516688-6907; E-mail: wenchaozhang116@163.com

32 **Word count**

33 **3510**

34

35

36

37

38

39

40

41

42

43

44

45

46

For peer review only



1  
2  
3  
4 47 **Effects of general versus regional anesthesia on circadian melatonin**  
5  
6 48 **rhythm and its association with postoperative delirium in elderly patients**  
7  
8  
9 49 **undergoing hip fracture surgery: study protocol for a prospective cohort**  
10  
11 50 **clinical trial**  
12  
13  
14

15 51 **Abstract**  
16  
17

18  
19 52 **Introduction:** Postoperative delirium (POD) is a common neurological  
20  
21  
22 53 complication after hip fracture surgery, and is associated with high morbidity and  
23  
24 54 mortality in elderly patients. Although, the specific mechanism of POD remains unclear,  
25  
26  
27 55 circadian rhythm disruptions have recently drawn increased attention. To date, only  
28  
29  
30 56 limited postoperative time points of plasma melatonin level measurements were  
31  
32 57 recorded in previous studies, and such data cannot represent a comprehensive  
33  
34  
35 58 melatonin rhythm. The process of anesthesia (either general anesthesia [GA] or regional  
36  
37 59 anesthesia [RA]) is known to influence the melatonin rhythm. However, how these two  
38  
39  
40 60 anesthesia methods differently affect the postoperative melatonin rhythm is still  
41  
42 61 unknown. Therefore, we hypothesize that RA may attenuate the disruption of the  
43  
44 62 melatonin rhythm, which might decrease the incidence of POD in elderly patients  
45  
46  
47 63 undergoing hip surgery.  
48  
49

50  
51 64 **Methods and analysis:** In this prospective cohort clinical trial, 138 patients  
52  
53 65 scheduled for hip fracture surgery will be divided into two groups to receive either GA  
54  
55 66 or RA. The primary aim is to compare the circadian rhythm of melatonin secretion  
56  
57  
58 67 between the two groups and explore its association with the incidence of POD.  
59  
60

1  
2  
3  
4 68 **Ethics and dissemination:** The study has been approved by the Medical  
5  
6 69 Science Research Ethics Committees of Beijing Jishuitan Hospital (JLKS201901-04).  
7  
8  
9 70 The results of the study will be published in peer-reviewed international journals.  
10  
11

12  
13 71 **Trial registration number:** The study has been registered at the Chinese  
14  
15 72 Clinical Trial Registry (www.chictr.org.cn) with identifier ChiCTR1900027393. The  
16  
17  
18 73 latest of the trial protocol has been approved on 11 November 2019.  
19  
20

21  
22 74 **Keywords:** Postoperative delirium; Circadian rhythm; Melatonin; General  
23  
24 75 anesthesia; Regional anesthesia; Elderly patients.  
25  
26

27 76

#### 28 29 30 77 **Strengths and limitations of this study**

31  
32 78 (1) A major strength of this study is that to our knowledge, this is the first trial to  
33  
34 79 evaluate the effects of different anesthesia methods (RA and GA) on the circadian  
35  
36  
37 80 rhythm of melatonin secretion and explore their association with POD in elderly  
38  
39  
40 81 patients undergoing hip fracture surgery.

41  
42 82 (2) Both objective and subjective sleep quality are included in the current study. This  
43  
44 83 can provide a better and more comprehensive understanding of the connection  
45  
46  
47 84 between circadian rhythms and anesthesia.

48  
49  
50 85 (3) The limitation of the trial is that melatonin is the optimal peripheral biomarker of  
51  
52 86 circadian timing, more biomarkers such as cytokines and genes (peripheral clock  
53  
54  
55 87 gene) should be included.

56  
57  
58 88 (4) Although we will record both subjective and objective sleep quality, such  
59  
60

1  
2  
3  
4 89 measurements are incomplete, for example, polysomnography is the gold standard  
5  
6 90 for diagnosis of sleep disorders.  
7  
8

9 91 (5) Our study will be conducted until discharge from the hospital, which might be  
10  
11 92 insufficient for delirium screening.  
12  
13  
14

## 15 93 **INTRODUCTION**

16  
17  
18 94 Postoperative delirium (POD), a common neurological complication in elderly patients  
19  
20 95 undergoing hip fracture surgery (range, 4%–53%), is usually associated with increased  
21  
22 96 morbidity and mortality rates, long-term cognitive decline, and a heavier healthcare  
23  
24 97 economic burden.<sup>1-6</sup> Many studies have indicated that preoperative brain dysfunction  
25  
26 98 (frail brain) in elderly patients is a predisposing factor for POD<sup>7, 8</sup>, while the  
27  
28 99 perioperative change of neuroinflammatory markers (e.g., C-reactive protein and  
29  
30 100 interleukin-6), oxidative stressor markers (cortisol) and the crucial hormone  
31  
32 101 (melatonin) within elderly frail brain are the precipitating factors for POD.<sup>8,9</sup> However,  
33  
34 102 the specific mechanism of POD remains unclear.<sup>9,10</sup>  
35  
36  
37  
38  
39  
40  
41

42 103 Circadian rhythm disruptions have recently drawn increased attention as a possible  
43  
44 104 mechanism of POD.<sup>10, 11</sup> Circadian rhythms refer to the behavioral and physiological  
45  
46 105 cycles that occur within approximately 24 hours, including the sleep-wake cycles,  
47  
48 106 hormone secretion, and core body temperature.<sup>12</sup> Among these indicators, plasma  
49  
50 107 melatonin is considered to be the best peripheral marker of endogenous circadian  
51  
52 108 rhythms.<sup>13-15</sup> Previous studies have revealed potential correlations between plasma  
53  
54 109 melatonin secretion disruption and POD.<sup>10, 16-20</sup> Nevertheless, only limited  
55  
56  
57  
58  
59  
60

1  
2  
3  
4 110 postoperative time points (e.g., once a day) of plasma melatonin level measurements  
5  
6 111 were recorded in those studies, and such data cannot represent a comprehensive  
7  
8  
9 112 melatonin rhythm. Moreover, one study indicated that the urinary excretion of 6-  
10  
11 113 sulfatoxymelatonin (6-SMT), the main metabolite of melatonin, during delirium was  
12  
13  
14 114 associated with clinical subtypes of delirium (higher in hypoactive and lower in  
15  
16  
17 115 hyperactive delirium).<sup>21</sup> However, measuring the melatonin level in a urine sample  
18  
19 116 instead of a plasma sample at only one time point is insufficient to describe the real  
20  
21  
22 117 pattern of the melatonin rhythm in the acute phase of delirium. Therefore, the exact  
23  
24  
25 118 association between the melatonin rhythm and delirium requires further exploration.

26  
27  
28 119 The process of anesthesia (either general anesthesia [GA] or regional anesthesia [RA])  
29  
30  
31 120 is known to influence the circadian rhythms.<sup>22-24</sup> On one hand, GA is associated with  
32  
33  
34 121 unconsciousness similar to a dreamless sleep, which may strongly alter circadian  
35  
36  
37 122 rhythms through the use of drugs such as N-methyl-D-aspartate (NMDA) receptor  
38  
39 123 antagonists or gamma-aminobutyric acid (GABA) receptor agonists<sup>22, 25, 26</sup>. On the other  
40  
41  
42 124 hand, RA is more helpful in the relief of sleep disturbances after surgery than GA<sup>27</sup>,  
43  
44  
45 125 which may result from better maintenance of the melatonin rhythm postoperatively.  
46  
47  
48 126 However, the effects of these two anesthesia methods on the postoperative melatonin  
49  
50  
51 127 rhythm have not been compared. Therefore, we hypothesize that RA may attenuate the  
52  
53  
54 128 disruption of the melatonin rhythm, which might decrease the incidence of POD in  
55  
56  
57 129 elderly patients undergoing hip surgery. In this report, we present the design of a  
58  
59  
60 130 prospective cohort clinical trial to compare the effects of GA versus RA on the circadian

1  
2  
3  
4 131 rhythm of melatonin secretion and the incidence of POD in elderly patients undergoing  
5  
6 132 hip fracture surgery.  
7  
8  
9

## 10 133 **METHODS AND ANALYSIS**

### 11 12 13 134 **Trial design**

14  
15 135 This prospective single-center, 1:1 matched cohort clinical trial is designed to compare  
16  
17  
18 136 the effects of GA and RA on the melatonin rhythm and incidence of POD. We aim to  
19  
20  
21 137 recruit 138 patients with hip fracture ( $\geq 65$  years of age) who will be assigned to either  
22  
23  
24 138 the GA group (n = 69) or the RA group (n = 69) depending on their situation and  
25  
26 139 personal willingness as well as the preference of the anesthesiologists and surgeons. We  
27  
28  
29 140 will conduct the trial at the Beijing Jishuitan Hospital in China from November 2019  
30  
31 141 until the target sample size is achieved. Figure 1 shows the flow chart of this study.  
32

### 33 142 **Primary outcome**

34  
35  
36 143 The primary outcome is to compare the circadian rhythm of melatonin secretion  
37  
38  
39 144 between the GA and RA groups and explore its association with the incidence of POD  
40  
41  
42 145 until discharge from the hospital.  
43

### 44 146 **Secondary outcomes**

45  
46  
47 147 The secondary outcomes are to compare the subtype and severity of POD, plasma  
48  
49  
50 148 cortisol levels, C-reactive protein, interleukin-6, sleep quality, and pain until discharge  
51  
52  
53 149 from the hospital, and postoperative cognitive function at 6 months and 1 year after  
54  
55 150 surgery between the GA and RA groups.  
56

### 57 151 **Eligibility criteria**

1  
2  
3  
4 152 ***Inclusion criteria***

5  
6 153 Participants will be included if they meet the following criteria: age of  $\geq 65$  years,  
7  
8  
9 154 hospital admission for surgical treatment of hip fracture, and American Society of  
10  
11  
12 155 Anesthesiologists (ASA) physical status classification of I to III.

13  
14 156 ***Exclusion criteria***

15  
16  
17 157 Patients who meet any of the following criteria will be excluded: Parkinson's disease,  
18  
19 158 dementia (including dementia caused by Parkinson's disease, Alzheimer's disease, or  
20  
21  
22 159 Lewy body dementia), a stroke within the prior 6 months, or any other central nervous  
23  
24  
25 160 system disease, alcohol-related disorders, multiple trauma, preoperative delirium,  
26  
27  
28 161 severe deafness or vision problems, communication difficulties, night shift duty, taking  
29  
30  
31 162 medication related to melatonin, a plan to be transferred to the intensive care unit  
32  
33 163 postoperatively, and refusal to participate in the study or unexpected discharge.

34  
35 164 **Preoperative baseline data collection and evaluation**

36  
37  
38 165 Trained investigators who are blind to the patient grouping will evaluate the patients  
39  
40  
41 166 and their medical charts to screen out potential participants according to the inclusion  
42  
43  
44 167 and exclusion criteria. Baseline data will be collected, including demographic data (e.g.,  
45  
46  
47 168 age, sex, race, education level, height, and weight), surgical diagnosis, comorbidities,  
48  
49  
50  
51 169 medication history, surgical history, smoking and drinking status, and the results of  
52  
53  
54 170 physical, laboratory, and instrumental examinations. We will also record the ASA  
55  
56  
57 171 physical status classification. Specifically, preoperative cognitive scans will be  
58  
59  
60 172 performed using the Mini-Mental State Examination (MMSE)<sup>28</sup>; preoperative delirium  
173 will be diagnosed with the Confusion Assessment Method (CAM)<sup>29,30</sup>; activities of daily

1  
2  
3  
4 174 living and instrumental activities of daily living will be assessed with the Katz Index of  
5  
6 175 Independence in Activities of Daily Living (ADL)<sup>31</sup>; sleep quality will be assessed by the  
7  
8  
9 176 Pittsburgh Sleep Quality Index (PSQI)<sup>32</sup>; and pain intensity will be assessed using the  
10  
11  
12 177 numerical rating scale (NRS)<sup>33</sup>.

### 178 **Perioperative management**

179 All individuals will be placed in a standard private room with a consistent light-dark  
18  
19 180 cycle and room temperature during the study period. The lights will be turned off  
20  
21  
22 181 between 20:00 and 06:00 even at the time of blood sample collection, and light  
23  
24  
25 182 exposure (controlled to be < 10 lux) will be measured during the night-time sleep period.  
26  
27 183 The participants will be requested to refrain from alcohol, caffeine, and chocolate. Their  
28  
29  
30 184 activities will be restricted from 20:00 to 06:00, during which time they will be free  
31  
32  
33 185 from interference factors including noise, television, and mobile phones during the  
34  
35  
36 186 study period.

### 187 **Anesthesia and analgesia**

188 All patients will receive an ultrasound-guided fascia iliac block (a single injection of 30  
41  
42  
43 189 mL of 0.33% ropivacaine) after admission to the operating room. During the operation,  
44  
45  
46 190 the patients' eyes will be carefully covered with eye patches to avoid light effects.  
47  
48 191 Sedatives (benzodiazepine and dexmedetomidine) or anticholinergics will be avoided  
49  
50  
51 192 during the perioperative phase.

52  
53 193 In the RA group, ropivacaine will be used for spinal anesthesia or combined spinal and  
54  
55  
56 194 epidural anesthesia at the L2-3 or L3-4 levels, and the sensory block will be controlled  
57  
58  
59 195 at T8-T10. If regional anesthesia fails, the patients will receive surgery under GA and  
60

1  
2  
3  
4 196 will withdraw from this trial to avoid the influence of lumbar puncture. In the GA group,  
5  
6 197 standard GA will be administered to the patients. Anesthesia will be intravenously  
7  
8  
9 198 induced with 0.5–1.5 mg/kg propofol, 0.2 mg/kg etomidate, 0.3 µg/kg sufentanil, and  
10  
11  
12 199 0.15 mg/kg cisatracurium. Anesthesia will be maintained with sevoflurane, propofol,  
13  
14 200 and remifentanil, and the bispectral (BIS) value will be maintained between 40 and 60.  
15  
16  
17 201 Mechanical ventilation will be continued to keep the end-tidal carbon dioxide  
18  
19 202 concentration at 35 to 40 mmHg in the GA group. A Vigileo/FloTrac device will be used  
20  
21  
22 203 for measuring stroke volume variation and cardiac index to guide fluid therapy. Fluids  
23  
24 204 or vasoactive substances will be administered to maintain mean arterial pressure (MAP)  
25  
26  
27 205 > 70 mmHg, heart rate < 100 beat per min (bpm), and urine output > 0.5 ml/kg/h.  
28  
29  
30 206 Meanwhile, all patients will be warmed with forced air and intravenous fluids. On the  
31  
32 207 day of surgery, intraoperative parameters will be recorded, including the mean arterial  
33  
34  
35 208 pressure, heart rate, BIS value, start time of anesthesia and surgery, duration and type  
36  
37  
38 209 of anesthesia and surgery, anesthetic drugs and doses, sedative doses, blood loss, fluid  
39  
40 210 balance and transfusion of blood or clotting products, complications, and adverse  
41  
42  
43 211 events.

44  
45 212 For postoperative analgesia management, the patients will receive intravenous patient-  
46  
47  
48 213 controlled analgesia (100 µg sufentanil and 8 mg ondansetron mixed with normal saline  
49  
50  
51 214 to a total volume of 100 mL). Intramuscular injection of pethidine (50 mg) or oral use  
52  
53  
54 215 of oxycodone (5 mg)/acetaminophen (325 mg) will be made as remedy analgesia.

## 216 **Postoperative management and follow-up**

217 All patients will be followed up twice a day (8:00 and 20:00) until discharge from the



1  
2  
3  
4 218 hospital. The investigators blind to grouping will record the total hospitalization cost,  
5  
6 219 the in-hospital length of stay, and the occurrence of postoperative complications during  
7  
8  
9 220 hospitalization. Long-term cognitive function will be assessed for 1 year after surgery.  
10

11 221 1. Delirium assessment  
12  
13

14 222 Delirium will be diagnosed using the CAM, and the subtype and severity of delirium  
15  
16 223 will be assessed by using the Memorial Delirium Assessment Scale <sup>34</sup>. Surveillance  
17  
18 224 will involve twice-daily visits (8:00 and 20:00) by a trained geriatrician. The  
19  
20 225 duration of delirium will be measured as the number of days from onset of delirium  
21  
22 226 symptoms to resolution of symptoms. If the researcher is in doubt regarding this  
23  
24 227 assessment, the diagnosis of POD will be referred to an external expert.  
25  
26  
27  
28  
29

30 228 2. Sleep assessment  
31

32 229 All participants will continuously wear a sleep tracker (Fitbit Charge 3; Fitbit, Inc.,  
33  
34 230 San Francisco, CA, USA), which is an available and inexpensive method to quantify  
35  
36 231 sleep patterns <sup>35</sup>. The investigators will provide instructions on wearing the sleep  
37  
38 232 tracker, a mobile device capable of downloading Fitbit Connect software, and  
39  
40 233 completing the corresponding sleep logs (bedtime, wake time, and nap times). The  
41  
42 234 frequency of syncing will be checked by the research staff weekly, and the Fitbit  
43  
44 235 Charge proprietary algorithm will process the sensor data to automate the sleep  
45  
46 236 variables <sup>36</sup>. All patients will wear sleep trackers until discharge from the hospital.  
47  
48 237 Based on the data from the sleep tracker, sleep logs, and direct observation by a  
49  
50 238 third party, we will derive the following data: total sleep time (min), sleep onset  
51  
52 239 latency (min), wake time after sleep onset (min), time in rapid eye movement sleep,  
53  
54  
55  
56  
57  
58  
59  
60

1  
2  
3  
4 240 and time spent in “light sleep” and “deep sleep” (according to Fitbit Inc.). Subjective  
5  
6 241 sleep quality will be assessed with an NRS (0 = worst sleep and 10 = best sleep) <sup>37</sup>.  
7  
8  
9 242 3. The intensity of postoperative pain both at rest and with movement will be evaluated  
10  
11 243 twice daily (8:00 and 20:00) with the NRS.  
12  
13  
14 244 4. Cognitive function will be assessed by the same geriatrician at 6 months and 1 year  
15  
16 245 after surgery. The Modified Telephone Interview for Cognitive Status will be used to  
17  
18 246 test the patient’s cognitive function in non-face-to-face interviews <sup>37</sup>.  
19  
20  
21

### 22 247 **Blinding**

23  
24 248 An investigator will be assigned to preserve and distribute results. Investigators will be  
25  
26 249 not blinded to the study group assignment, but the trained geriatrician responsible for  
27  
28 250 postoperative evaluation including POD diagnosis, as well as PSQI, ADLs, and NRS  
29  
30 251 scores are blinded to the grouping.  
31  
32  
33

### 34 252 **Light exposure**

35  
36 253 Considering that light suppresses melatonin secretion except in life-threatening  
37  
38 254 situations, the only illumination from a penlight will be used during these interventions  
39  
40 255 <sup>15, 19</sup>. Blood sample collection and nursing interventions at night will be performed with  
41  
42 256 a penlight to avoid light exposure. Light intensity readings will be obtained with a digital  
43  
44 257 meter to ensure that light exposure does not exceed 10 lux.  
45  
46  
47  
48  
49

### 50 258 **Sample Collection**

51  
52 259 Usually, the melatonin concentration is low throughout the day and then rises to a peak  
53  
54 260 between 02:00 and 04:00 <sup>15</sup>. To establish the circadian rhythm, the plasma  
55  
56 261 concentration of melatonin will be measured at least four times a day <sup>15, 19</sup>. Postoperative  
57  
58  
59  
60

1  
2  
3  
4 262 blood samples will be dynamically collected every day at 04:00, 10:00, 16:00, and 22:00  
5  
6 263 until the patient is discharged through venipuncture (2 ml per sample) <sup>16, 19</sup>. All blood  
7  
8 264 samples will be collected in the heparinized tubes. The samples will be centrifuged at  
9  
10 265 3000 rpm for 10 min and will be stored at -80°C until further analysis. We will measure  
11  
12 266 plasma melatonin, cortisol, C-reactive protein (CRP), and interleukin-6 (IL-6).  
13  
14 267 Laboratory technicians will be blinded to the results of all clinical data. The  
15  
16 268 concentration of melatonin will be measured with the enzyme immunoassay method  
17  
18 269 (cat no. RE 54021; IBL International GmbH, Hamburg, Germany) with a limit of  
19  
20 270 detection of 1.6 pg/mL <sup>38</sup>. Plasma cortisol levels will be analyzed using an  
21  
22 271 electrochemiluminescence immunoassay method (Roche Diagnostics GmbH,  
23  
24 272 Germany). To measure inflammation, we will measure plasma C-reactive protein (CRP)  
25  
26 273 and interleukin-6 (IL-6) using immunoturbidimetry (Beckman Coulter, Inc., USA) and  
27  
28 274 electrochemiluminescence immunoassay method (Roche, Germany), respectively.  
29  
30  
31  
32  
33  
34  
35  
36

### 37 **Sample size estimation**

38  
39  
40 276 Melatonin is secreted in a biphasic pattern in which nighttime secretion increases from  
41  
42 277 20:00 to 22:00 with a peak at 02:00 to 04:00, and daytime secretion decreases from  
43  
44 278 06:00 to 08:00 with a nadir at 12:00 <sup>14, 39</sup>. Cronin et al. <sup>15</sup> researched the nighttime  
45  
46 279 melatonin secretion of adult patients for 3 days after gynecologic surgery and found that  
47  
48 280 the lowest level occurred on the first night postoperatively. In another study of elderly  
49  
50 281 patients undergoing major abdominal surgery, Shigeta et al. <sup>40</sup> found that the  
51  
52 282 postoperative amplitude of nighttime melatonin secretion was significantly lower than  
53  
54 283 the preoperative amplitude. These findings indicate that the peak of melatonin secretion  
55  
56  
57  
58  
59  
60

1  
2  
3  
4 284 is suppressed to the greatest degree in the first postoperative night, possibly leading to  
5  
6 285 a melatonin rhythm shift. Therefore, for the present study, we will choose 04:00 on the  
7  
8  
9 286 first postoperative night as the time point for comparing the melatonin concentration  
10  
11 287 between the groups. Our pilot study showed that the mean  $\pm$  standard deviation of  
12  
13  
14 288 melatonin was  $10.48 \pm 4.04$  and  $13.40 \pm 6.85$  pg/mL in the GA and RA groups (n=15 in  
15  
16  
17 289 each group), respectively. Using a two-sided  $\alpha$  value of 0.05 and 85% power and  
18  
19  
20 290 considering a 10% dropout rate, we plan to include 138 patients in this study, with 69  
21  
22 291 patients in each group (1:1).

#### 292 **Circadian melatonin rhythm data**

293 Circadian markers of the melatonin rhythm, including the mesor (mean concentration)  
294 and amplitude (peak value minus the mean value), acrophase time (peak time), will be  
295 calculated by Origin (OriginLab Corp, USA) based on cosinor regression  
296  $y = a + b \cdot \cos(x \cdot \pi / 12 - c \cdot \pi / 12)$ , in which a, b, and c represent mesor, amplitude, and  
297 acrophase, respectively <sup>41</sup>. The data will be subsequently smoothed with the cosinor  
298 method curve-fitting procedure (GraphPad Prism 8; GraphPad Software, Inc) <sup>41,42</sup>.

#### 299 **Adverse events**

300 In the study, the intervention measures of both groups are anesthesia methods currently  
301 being used. Therefore, there will be no additional risk to participants. The safety of  
302 patients will be monitored, and patients will receive study information including explicit  
303 details on whom to contact, and will be told to withdraw from the trial and get the  
304 corresponding compensation in case of an adverse event situation.

#### 305 **Data management and storage**

1  
2  
3  
4 306 At the first meeting, researchers will make appointments for the following dates to  
5  
6 307 improve adherence to the study. All the data will be collected recorded in the Case  
7  
8  
9 308 Report Forms (CRF). After the data is recorded, the data will be stored in a locked  
10  
11 309 cabinet. Data entry will be performed by two investigators with the EpiData3.10  
12  
13  
14 310 database system. Personal information of participants will be confidentially kept, and  
15  
16  
17 311 all data will be identified by a name acronym and a study identification number in the  
18  
19 312 CRF. The data analysis will be performed by the primary investigator and designated  
20  
21  
22 313 teammates.

#### 23 24 25 314 **Ethics and Declarations**

26  
27 315 During the study period, we will follow the Declaration of Helsinki and Chinese  
28  
29  
30 316 guidelines of Good Clinical Practice to guarantee the right of the patients. The study  
31  
32 317 protocol has been approved by the Medical Science Research Ethics Committees of  
33  
34  
35 318 Beijing Jishuitan Hospital (JLKS201901-04). This study has been registered at the  
36  
37  
38 319 Chinese Clinical Trial Registry (ChiCTR1900027393). To inform the purpose and risks  
39  
40  
41 320 of the study, each enrolled patient accompanied by at least one family member or proxy  
42  
43 321 will sign a written informed consent. Besides, participants will sign the additional  
44  
45 322 consent provisions for collection and use of participant data and biological specimens  
46  
47  
48 323 in ancillary studies. And all participants and investigators will keep the written  
49  
50  
51 324 informed consent. The primary investigator will regularly report on the progress and  
52  
53 325 changes of the study to the local Ethics Committee. The results of the study will be  
54  
55  
56 326 published in peer-reviewed international journals and will be presented at national and  
57  
58  
59 327 international conferences and symposiums.  
60

### 328 **Data safety monitoring**

329 The data monitoring committee (DMC) comprised of two specialists outside the trial  
330 will be monitoring the progress and safety of the trial. And the DMC can give  
331 suggestions on safety issues and even pause the trial.

### 332 **Statistical analysis**

333 Demographic data and information on pain scores, delirium, and sleep assessment data,  
334 and adverse events during and after surgery will be recorded. Data will be presented as  
335 mean and standard deviation, median and interquartile range (25th–75th percentile),  
336 or frequency and proportion depending on the variable type and distribution.  
337 Categorical variables will be assessed with the  $\chi^2$  test or Fisher's exact test. Differences  
338 in continuous variables between the groups will be assessed with a parametric *t*-test, the  
339 Wilcoxon rank-sum test, or the Kruskal–Wallis test. The Mann–Whitney U test will be  
340 used to analyze non-normal variables. Results will be presented with 95% confidence  
341 intervals. The association between melatonin parameters and sleep quality as well as  
342 POD will be also validated by Pearson or Spearman analysis, and linear regression  
343 analysis. Multiple imputation methods, i.e., mean completer and regression, will be  
344 used to handle missing data. A *P* value of <0.05 will be considered statistically  
345 significant. All statistical analyses will be performed with SPSS software, version 21.0  
346 (IBM Corp., Armonk, NY, USA).

### 347 **DISCUSSION**

348 This clinical trial is designed to test whether RA can relieve perioperative melatonin  
349 rhythm disruption compared with GA and decrease the incidence of POD in elderly

1  
2  
3  
4 350 patients with hip fracture.  
5

6 351 Although some previous studies have shown connections between melatonin secretion  
7  
8  
9 352 disruption and delirium, few have elucidated the real melatonin rhythm pattern <sup>43-45</sup>.  
10  
11 353 For example, a prospective observational study by Yoshitaka et al. showed that the delta  
12  
13 354 plasma melatonin concentration (calculated based on the preoperative and  
14  
15 355 postoperative values at selected time points) at 1 hour after surgery was significantly  
16  
17 356 lower in patients with than without delirium <sup>46</sup>. Melatonin secretion exhibits a biphasic  
18  
19 357 pattern in which daytime secretion is low (5 pg/mL on average) and nighttime secretion  
20  
21 358 is relatively high (50–100 pg/ml) <sup>14, 39</sup>. However, the sample collection time points of  
22  
23 359 melatonin in the above-mentioned study (before the operation, 1 hour after the  
24  
25 360 operation, and at 08:00 on postoperative days 1 and 2) represented either nighttime  
26  
27 361 secretion on the operation day or daytime secretion on the postoperative days; thus, the  
28  
29 362 measurements do not represent the comprehensive rhythm of melatonin. In contrast,  
30  
31 363 in the current study the blood samples will be taken before anesthesia, postoperative  
32  
33 364 blood samples (melatonin) every day at 04:00, 10:00, 16:00 and 22:00 until discharge.  
34  
35 365 These measurements are adequate to establish a melatonin rhythm curve. They will not  
36  
37 366 only show the individual postoperative melatonin concentrations but also allow us to  
38  
39 367 analyze the irregular pattern of melatonin secretion in patients with delirium.  
40  
41  
42  
43  
44  
45  
46  
47  
48  
49

50 368 Previous trials have shown that GA may influence postoperative melatonin secretion <sup>22-</sup>  
51  
52 369 <sup>24</sup>. First, in patients who received combined intravenous and inhaled anesthesia, the  
53  
54 370 melatonin levels decreased the first night after surgery <sup>24, 47</sup>. Second, GA by inhalation  
55  
56 371 was associated with a significant decrease in the melatonin concentration on the night  
57  
58  
59  
60

1  
2  
3  
4 372 of surgery, and this decrease was 350% greater than that on the third night after surgery  
5  
6 373 <sup>15</sup>. Third, total intravenous anesthesia induced a phase delay in the 6-SMT rhythm; the  
7  
8  
9 374 peak time was late by about 1 hour, and the amplitude of the melatonin rhythm  
10  
11 375 decreased by 85% on the night of surgery <sup>12</sup>. In contrast, another study demonstrated  
12  
13  
14 376 that RA was helpful to relieve sleep disturbance after surgery <sup>27</sup>, which may result from  
15  
16  
17 377 better maintenance of the melatonin rhythm postoperatively. However, little is known  
18  
19 378 about how the two anesthesia methods differently affect the melatonin rhythm. Karkela  
20  
21  
22 379 et al. <sup>24</sup> conducted a similar clinical study and found that anesthesia and surgery  
23  
24  
25 380 disturbed the circadian melatonin rhythm, but there was no significant difference in the  
26  
27  
28 381 melatonin secretion between the spinal anesthesia and GA groups for minor orthopedic  
29  
30  
31 382 operations <sup>24</sup>. We do not consider that these results are especially robust and  
32  
33  
34 383 generalizable because of several limitations of the trial, such as the small sample size  
35  
36  
37 384 (40 participants), measurement of only the saliva and urine concentrations of  
38  
39  
40 385 melatonin (no plasma or serum concentrations), and insufficient melatonin  
41  
42  
43 386 measurement timing (measurement of only nighttime secretion levels). We hypothesize  
44  
45  
46 387 that RA can maintain an almost normal melatonin rhythm for the following two reasons.  
47  
48  
49 388 First, RA may significantly reduce the types and amounts of general anesthetics used  
50  
51  
52 389 compared with GA, which can strongly alter melatonin secretion through different  
53  
54  
55 390 signal pathways. Second, RA allows better pain control and improved sleep quality  
56  
57  
58 391 compared with GA, which further facilitates a decrease in the severity of melatonin  
59  
60 392 rhythm disruption.

## 393 **CONCLUSION**



1  
2  
3  
4 394 In conclusion, to our knowledge, this is the first study to compare the circadian rhythm  
5  
6 395 of melatonin secretion between GA and RA groups and to explore the potential  
7  
8  
9 396 association between circadian rhythm disruptions and the development of delirium.  
10  
11 397 Our findings will promote a greater understanding of delirium pathophysiology and  
12  
13  
14 398 provide clinical evidence for the optimal anesthesia method in elderly patients  
15  
16  
17 399 undergoing hip fracture surgery.

18  
19  
20 400

21  
22 401 **Contributorship statement:** ZQL and XYG obtained funding. ZQL, WCZ, GW, and XYG  
23  
24 402 contributed to the study design. YY, YNS, YYJ, and YZ performed the trial. XNM ,XXJ and YZH  
25  
26 403 contributed to data collection. CL, YL, CMS and XXW analyzed the data. YNS and YY drafted the  
27  
28 404 manuscript. ZQL and WCZ carefully reviewed the manuscript. All authors have read and  
29  
30 405 approved the final manuscript.

31  
32  
33  
34 406 **Funding:** This research is supported by the National Natural Science Foundation of China  
35  
36 407 (81971012 and 81873726), Key Clinical Projects of Peking University Third Hospital  
37  
38 408 (BYSYZD2019027), and Peking University “Clinical Medicine plus X” Youth Project  
39  
40 409 (PKU2020LCXQ016).

41  
42  
43  
44  
45  
46 410 **Competing interests:** None declared.

47  
48  
49  
50 411 **Acknowledgments:** Not applicable.

51  
52  
53 412 **Patient and public involvement statement:** Patients and the public were not  
54  
55 413 involved in the design, conduct, reporting, and dissemination plans of this study.

56  
57  
58 414 **Patient consent for publication:** Not required.

415

416

## References

- 417 1. Sieber FE, Neufeld KJ, Gottschalk A, *et al.* Effect of Depth of Sedation in Older Patients  
418 Undergoing Hip Fracture Repair on Postoperative Delirium: The STRIDE Randomized  
419 Clinical Trial. *JAMA Surg.* 2018; 153(11):987-995.
- 420 2. Bruce AJ, Ritchie CW, Blizard R, *et al.* The incidence of delirium associated with  
421 orthopedic surgery: a meta-analytic review. *Int Psychogeriatr.* 2007; 19(2):197-214.
- 422 3. Su X, Meng ZT, Wu XH, *et al.* Dexmedetomidine for prevention of delirium in elderly  
423 patients after non-cardiac surgery: a randomised, double-blind, placebo-controlled trial.  
424 *The Lancet.* 2016; 388(10054):1893-1902.
- 425 4. Inouye SK, Westendorp RGJ, Saczynski JS. Delirium in elderly people. *The Lancet.* 2014;  
426 383(9920):911-922.
- 427 5. Wildes TS, Mickle AM, Ben Abdallah A, *et al.* Effect of Electroencephalography-Guided  
428 Anesthetic Administration on Postoperative Delirium Among Older Adults Undergoing  
429 Major Surgery: The ENGAGES Randomized Clinical Trial. *JAMA.* 2019; 321(5):473-483.
- 430 6. Leslie DL, Marcantonio ER, Zhang Y, *et al.* One-year health care costs associated with  
431 delirium in the elderly population. *Arch Intern Med.* 2008; 168(1):27-32.
- 432 7. Aldecoa C, Bettelli G, Bilotta F, *et al.* European Society of Anaesthesiology evidence-  
433 based and consensus-based guideline on postoperative delirium. *Eur J Anaesthesiol.*  
434 2017; 34(4):192-214.
- 435 8. Maldonado JR. Delirium pathophysiology: An updated hypothesis of the etiology of  
436 acute brain failure. *International journal of geriatric psychiatry.* 2018; 33(11):1428-1457.

- 1  
2  
3  
4 437 9. Marcantonio ER, Rudolph JL, Culley D, *et al.* Serum biomarkers for delirium. *J Gerontol*  
5  
6 438 *A Biol Sci Med Sci.* 2006; 61(12):1281-1286.  
7  
8  
9 439 10. Maldonado JR. Neuropathogenesis of delirium: review of current etiologic theories and  
10  
11 440 common pathways. *Am J Geriatr Psychiatry.* 2013; 21(12):1190-1222.  
12  
13  
14 441 11. Scott BK. Disruption of Circadian Rhythms and Sleep in Critical Illness and its Impact  
15  
16 442 on the Development of Delirium. *Curr Pharm Design.* 2015; 21(24):3443-3452.  
17  
18  
19 443 12. Gogenur I, Middleton B, Kristiansen VB, *et al.* Disturbances in melatonin and core body  
20  
21 444 temperature circadian rhythms after minimal invasive surgery. *Acta anaesthesiologica*  
22  
23 445 *Scandinavica.* 2007; 51(8):1099-1106.  
24  
25  
26  
27 446 13. Tordjman S, Chokron S, Delorme R, *et al.* Melatonin: Pharmacology, Functions and  
28  
29 447 Therapeutic Benefits. *Curr Neuropharmacol.* 2017; 15(3):434-443.  
30  
31  
32 448 14. Brzezinski A. Melatonin in humans. *N Engl J Med.* 1997; 336(3):186-195.  
33  
34  
35 449 15. Cronin AJ, Keifer JC, Davies MF, *et al.* Melatonin secretion after surgery. *Lancet.* 2000;  
36  
37 450 356(9237):1244-1245.  
38  
39  
40 451 16. Olofsson K, Alling C, Lundberg D, *et al.* Abolished circadian rhythm of melatonin  
41  
42 452 secretion in sedated and artificially ventilated intensive care patients. *Acta*  
43  
44 453 *anaesthesiologica Scandinavica.* 2004; 48(6):679-684.  
45  
46  
47  
48 454 17. Miyazaki T, Kuwano H, Kato H, *et al.* Correlation between serum melatonin circadian  
49  
50 455 rhythm and intensive care unit psychosis after thoracic esophagectomy. *Surgery.* 2003;  
51  
52 456 133(6):662-668.  
53  
54  
55  
56 457 18. Scholtens RM, van Munster BC, van Faassen M, *et al.* Plasma melatonin levels in hip  
57  
58 458 fracture patients with and without delirium: A confirmation study. *Mech Ageing Dev.*  
59  
60

- 1  
2  
3  
4 459 2017; 167:1-4.  
5  
6 460 19. Piotrowicz K, Klich-Raczka A, Pac A, *et al.* The diurnal profile of melatonin during  
7  
8  
9 461 delirium in elderly patients--preliminary results. *Exp Gerontol.* 2015; 72:45-49.  
10  
11 462 20. Fitzgerald JM, Adamis D, Trzepacz PT, *et al.* Delirium: a disturbance of circadian  
12  
13  
14 463 integrity? *Med Hypotheses.* 2013; 81(4):568-576.  
15  
16  
17 464 21. Balan S, Leibovitz A, Zila SO, *et al.* The relation between the clinical subtypes of delirium  
18  
19 465 and the urinary level of 6-SMT. *J Neuropsychiatry Clin Neurosci.* 2003; 15(3):363-366.  
20  
21  
22 466 22. Coppola S, Caccioppola A, Chiumello D. Internal clock and the surgical ICU patient.  
23  
24 467 *Current opinion in anaesthesiology.* 2019; 33(2):177-184.  
25  
26  
27 468 23. Poulsen RC, Warman GR, Sleight J, *et al.* How does general anaesthesia affect the  
28  
29 469 circadian clock? *Sleep Med Rev.* 2018; 37:35-44.  
30  
31  
32 470 24. Karkela J, Vakkuri O, Kaukinen S, *et al.* The influence of anaesthesia and surgery on the  
33  
34 471 circadian rhythm of melatonin. *Acta anaesthesiologica Scandinavica.* 2002; 46(1):30-36.  
35  
36  
37 472 25. Dispersyn G, Pain L, Challet E, *et al.* General anesthetics effects on circadian temporal  
38  
39 473 structure: an update. *Chronobiol Int.* 2008; 25(6):835-850.  
40  
41  
42 474 26. Guo XY, Kuzumi E, Charman SC, *et al.* Perioperative melatonin secretion in patients  
43  
44 475 undergoing coronary artery bypass grafting. *Anesth Analg.* 2002; 94(5):1085-1091.  
45  
46  
47 476 27. Kjolhede P, Langstrom P, Nilsson P, *et al.* The impact of quality of sleep on recovery  
48  
49 477 from fast-track abdominal hysterectomy. *J Clin Sleep Med.* 2012; 8(4):395-402.  
50  
51  
52 478 28. Girard TD, Thompson JL, Pandharipande PP, *et al.* Clinical phenotypes of delirium  
53  
54 479 during critical illness and severity of subsequent long-term cognitive impairment: a  
55  
56 480 prospective cohort study. *Lancet Respir Med.* 2018; 6(3):213-222.  
57  
58  
59  
60

- 1  
2  
3  
4 481 29. Evered L, Silbert B, Knopman DS, *et al.* Recommendations for the nomenclature of  
5  
6 482 cognitive change associated with anaesthesia and surgery-2018. *Br J Anaesth.* 2018;  
7  
8  
9 483 121(5):1005-1012.  
10  
11 484 30. Palanca BJA, Wildes TS, Ju YS, *et al.* Electroencephalography and delirium in the  
12  
13  
14 485 postoperative period. *Br J Anaesth.* 2017; 119(2):294-307.  
15  
16 486 31. Katz S, Ford AB, Moskowitz RW, *et al.* STUDIES OF ILLNESS IN THE AGED. THE  
17  
18  
19 487 INDEX OF ADL: A STANDARDIZED MEASURE OF BIOLOGICAL AND  
20  
21  
22 488 PSYCHOSOCIAL FUNCTION. *JAMA.* 1963; 185(12):914-919.  
23  
24 489 32. Buysse DJ, Reynolds CF, Monk TH, *et al.* The Pittsburgh Sleep Quality Index - a New  
25  
26  
27 490 Instrument for Psychiatric Practice and Research. *Psychiat Res.* 1989; 28(2):193-213.  
28  
29 491 33. Bahreini M, Jalili M, Moradi-Lakeh M. A Comparison of Three Self-Report Pain Scales  
30  
31  
32 492 in Adults with Acute Pain. *J Emerg Med.* 2015; 48(1):10-18.  
33  
34 493 34. Gross AL, Tommet D, D'Aquila M, *et al.* Harmonization of delirium severity instruments:  
35  
36  
37 494 a comparison of the DRS-R-98, MDAS, and CAM-S using item response theory. *BMC*  
38  
39  
40 495 *Med Res Methodol.* 2018; 18(1):92.  
41  
42 496 35. de Zambotti M, Goldstone A, Claudatos S, *et al.* A validation study of Fitbit Charge 2™  
43  
44  
45 497 compared with polysomnography in adults. *Chronobiol Int.* 2018; 35(4):465-476.  
46  
47 498 36. Castner J, Mammen MJ, Jungquist CR, *et al.* Validation of fitness tracker for sleep  
48  
49  
50 499 measures in women with asthma. *J Asthma.* 2019; 56(7):719-730.  
51  
52 500 37. Zhang Y, Li HJ, Wang DX, *et al.* Impact of inhalational versus intravenous anaesthesia  
53  
54  
55 501 on early delirium and long-term survival in elderly patients after cancer surgery: study  
56  
57  
58 502 protocol of a multicentre, open-label, and randomised controlled trial. *BMJ Open.* 2017;  
59  
60

- 1  
2  
3  
4 503 7(11):e018607.  
5  
6 504 38. Kennaway DJ. A critical review of melatonin assays: Past and present. *J Pineal Res*, 2019;  
7  
8  
9 505 67(1): e12572.  
10  
11 506 39. Rzepka-Migut B, Paprocka J. Melatonin-Measurement Methods and the Factors  
12  
13  
14 507 Modifying the Results. A Systematic Review of the Literature. *Int J Environ Res Public*  
15  
16  
17 508 *Health* 2020, 17(6):1916.  
18  
19 509 40. Shigeta H, Yasui A, Nimura Y, et al. Postoperative delirium and melatonin levels in  
20  
21  
22 510 elderly patients. *Am J Surg*. 2001; 182(5):449-454.  
23  
24  
25 511 41. Liu L, Wang Z, Cao J, et al. Effect of melatonin on monochromatic light-induced changes  
26  
27  
28 512 in clock gene circadian expression in the chick liver. *J Photochem Photobiol B*.  
29  
30  
31 513 2019;197:111537.  
32  
33 514 42. Refinetti R, Lissen GC, Halberg F. Procedures for numerical analysis of circadian  
34  
35  
36 515 rhythms. *Biol Rhythm Res*. 2007;38:275-325.  
37  
38 516 43. Lu Y, Li YW, Wang L, et al. Promoting sleep and circadian health may prevent  
39  
40  
41 517 postoperative delirium: A systematic review and meta-analysis of randomized clinical  
42  
43  
44 518 trials. *Sleep Med Rev*. 2019; 48:101207.  
45  
46 519 44. FitzGerald JM, O'Regan N, Adamis D, et al. Sleep-wake cycle disturbances in elderly  
47  
48  
49 520 acute general medical inpatients: Longitudinal relationship to delirium and dementia.  
50  
51  
52 521 *Alzheimers Dement (Amst)*. 2017; 7:61-68.  
53  
54 522 45. Yousaf F, Seet E, Venkatraghavan L, et al. Melatonin and postoperative delirium: a  
55  
56  
57 523 possible link? *Can J Anaesth*. 2010; 57(8):794-795.  
58  
59 524 46. Yoshitaka S, Egi M, Morimatsu H, et al. Perioperative plasma melatonin concentration  
60

1  
2  
3  
4 525 in postoperative critically ill patients: its association with delirium. J Crit Care. 2013;  
5  
6 526 28(3):236-242.  
7  
8  
9 527 47. Ram E, Vishne TH, Weinstein T, et al. General anesthesia for surgery influences  
10  
11 528 melatonin and cortisol levels. World J Surg. 2005; 29(7):826-829.  
12  
13  
14 529  
15  
16  
17 530  
18  
19 531  
20  
21  
22 532  
23  
24  
25 533  
26  
27 534  
28  
29  
30 535  
31  
32 536  
33  
34  
35 537  
36  
37 538  
38  
39  
40 539  
41  
42  
43 540  
44  
45 541  
46  
47  
48 542  
49  
50  
51 543  
52  
53 544  
54  
55  
56 545  
57  
58 546  
59  
60

1  
2  
3  
4 547  
5

6 548 **Figure legend**

7  
8  
9 549 **Figure 1 Flow chart of the trial.** ASA, American Society of Anesthesiologists; CAM,  
10  
11 550 Confusion Assessment Method; MMSE, Mini-Mental State Examination; ADL,  
12  
13 551 activities of daily living; PSQI, Pittsburgh Sleep Quality Index; IL, interleukin; CRP, C-  
14  
15 552 reactive protein; Cor, cortisol; MAP, mean arterial pressure; HR, heart rate; BIS,  
16  
17 553 bispectral index; MDAS, Memorial Delirium Assessment Scale; TICS-m, Modified  
18  
19 554 telephone interview for cognitive status.  
20  
21  
22  
23  
24

25 555  
26  
27  
28  
29  
30  
31  
32  
33  
34  
35  
36  
37  
38  
39  
40  
41  
42  
43  
44  
45  
46  
47  
48  
49  
50  
51  
52  
53  
54  
55  
56  
57  
58  
59  
60





Figure 1

50x101mm (300 x 300 DPI)

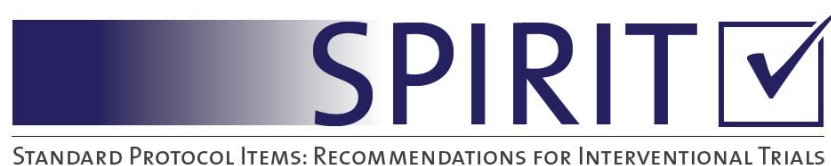

SPIRIT 2013 Checklist: Recommended items to address in a clinical trial protocol and related documents\*

| Section/item                      | Item No | Description                                                                                                                                                                                                                                                                              | Addressed on page number  |
|-----------------------------------|---------|------------------------------------------------------------------------------------------------------------------------------------------------------------------------------------------------------------------------------------------------------------------------------------------|---------------------------|
| <b>Administrative information</b> |         |                                                                                                                                                                                                                                                                                          |                           |
| Title                             | 1       | Descriptive title identifying the study design, population, interventions, and, if applicable, trial acronym                                                                                                                                                                             | <u>Page 1, line 2-4</u>   |
| Trial registration                | 2a      | Trial identifier and registry name. If not yet registered, name of intended registry                                                                                                                                                                                                     | <u>Page 15, line 319</u>  |
|                                   | 2b      | All items from the World Health Organization Trial Registration Data Set                                                                                                                                                                                                                 | <u>Page 4, line 71-73</u> |
| Protocol version                  | 3       | Date and version identifier                                                                                                                                                                                                                                                              | <u>Page 4, line 72-73</u> |
| Funding                           | 4       | Sources and types of financial, material, and other support                                                                                                                                                                                                                              | <u>Page 19, line 410</u>  |
| Roles and responsibilities        | 5a      | Names, affiliations, and roles of protocol contributors                                                                                                                                                                                                                                  | <u>Page 19, line 402</u>  |
|                                   | 5b      | Name and contact information for the trial sponsor                                                                                                                                                                                                                                       | <u>Page 19, line 409</u>  |
|                                   | 5c      | Role of study sponsor and funders, if any, in study design; collection, management, analysis, and interpretation of data; writing of the report; and the decision to submit the report for publication, including whether they will have ultimate authority over any of these activities | <u>Page 19, line 402</u>  |
|                                   | 5d      | Composition, roles, and responsibilities of the coordinating centre, steering committee, endpoint adjudication committee, data management team, and other individuals or groups overseeing the trial, if applicable (see Item 21a for data monitoring committee)                         | <u>Page 16, line 329</u>  |

|    |                                                           |     |                                                                                                               |                          |
|----|-----------------------------------------------------------|-----|---------------------------------------------------------------------------------------------------------------|--------------------------|
| 1  | Background and                                            | 6a  | Description of research question and justification for undertaking the trial, including summary of relevant   | <u>Page 5, line 93-</u>  |
| 2  | rationale                                                 |     | studies (published and unpublished) examining benefits and harms for each intervention                        | <u>132</u>               |
| 3  |                                                           |     |                                                                                                               |                          |
| 4  |                                                           | 6b  | Explanation for choice of comparators                                                                         | <u>Page 5, line 119-</u> |
| 5  |                                                           |     |                                                                                                               | <u>132</u>               |
| 6  |                                                           |     |                                                                                                               |                          |
| 7  | Objectives                                                | 7   | Specific objectives or hypotheses                                                                             | <u>Page 6, line 127-</u> |
| 8  |                                                           |     |                                                                                                               | <u>129</u>               |
| 9  |                                                           |     |                                                                                                               |                          |
| 10 | Trial design                                              | 8   | Description of trial design including type of trial (eg, parallel group, crossover, factorial, single group), | <u>Page 7, line 135</u>  |
| 11 |                                                           |     | allocation ratio, and framework (eg, superiority, equivalence, noninferiority, exploratory)                   |                          |
| 12 |                                                           |     |                                                                                                               |                          |
| 13 |                                                           |     |                                                                                                               |                          |
| 14 | <b>Methods: Participants, interventions, and outcomes</b> |     |                                                                                                               |                          |
| 15 |                                                           |     |                                                                                                               |                          |
| 16 | Study setting                                             | 9   | Description of study settings (eg, community clinic, academic hospital) and list of countries where data will | <u>Page 7, line 140</u>  |
| 17 |                                                           |     | be collected. Reference to where list of study sites can be obtained                                          |                          |
| 18 |                                                           |     |                                                                                                               |                          |
| 19 | Eligibility criteria                                      | 10  | Inclusion and exclusion criteria for participants. If applicable, eligibility criteria for study centres and  | <u>Page 8, line 153-</u> |
| 20 |                                                           |     | individuals who will perform the interventions (eg, surgeons, psychotherapists)                               | <u>163</u>               |
| 21 |                                                           |     |                                                                                                               |                          |
| 22 | Interventions                                             | 11a | Interventions for each group with sufficient detail to allow replication, including how and when they will be | <u>Page 7, line 136-</u> |
| 23 |                                                           |     | administered                                                                                                  | <u>139</u>               |
| 24 |                                                           |     |                                                                                                               |                          |
| 25 |                                                           | 11b | Criteria for discontinuing or modifying allocated interventions for a given trial participant (eg, drug dose  | <u>Page 9, line 195-</u> |
| 26 |                                                           |     | change in response to harms, participant request, or improving/worsening disease)                             | <u>196</u>               |
| 27 |                                                           |     |                                                                                                               |                          |
| 28 |                                                           | 11c | Strategies to improve adherence to intervention protocols, and any procedures for monitoring adherence        | <u>Page 15, line 307</u> |
| 29 |                                                           |     | (eg, drug tablet return, laboratory tests)                                                                    |                          |
| 30 |                                                           |     |                                                                                                               |                          |
| 31 |                                                           | 11d | Relevant concomitant care and interventions that are permitted or prohibited during the trial                 | <u>Page 9, line 191-</u> |
| 32 |                                                           |     |                                                                                                               | <u>192</u>               |
| 33 |                                                           |     |                                                                                                               |                          |
| 34 |                                                           |     |                                                                                                               |                          |
| 35 | Outcomes                                                  | 12  | Primary, secondary, and other outcomes, including the specific measurement variable (eg, systolic blood       | <u>Page 7, line 142-</u> |
| 36 |                                                           |     | pressure), analysis metric (eg, change from baseline, final value, time to event), method of aggregation (eg, | <u>150</u>               |
| 37 |                                                           |     | median, proportion), and time point for each outcome. Explanation of the clinical relevance of chosen         |                          |
| 38 |                                                           |     | efficacy and harm outcomes is strongly recommended                                                            |                          |
| 39 |                                                           |     |                                                                                                               |                          |
| 40 |                                                           |     |                                                                                                               |                          |
| 41 |                                                           |     |                                                                                                               |                          |
| 42 |                                                           |     |                                                                                                               |                          |
| 43 |                                                           |     |                                                                                                               |                          |
| 44 |                                                           |     |                                                                                                               |                          |
| 45 |                                                           |     |                                                                                                               |                          |
| 46 |                                                           |     |                                                                                                               |                          |

|   |                      |    |                                                                                                                                                                                       |                                                |
|---|----------------------|----|---------------------------------------------------------------------------------------------------------------------------------------------------------------------------------------|------------------------------------------------|
| 1 | Participant timeline | 13 | Time schedule of enrolment, interventions (including any run-ins and washouts), assessments, and visits for participants. A schematic diagram is highly recommended (see Figure)      | <a href="#">Page 8, line 164-186, 216- 246</a> |
| 2 |                      |    |                                                                                                                                                                                       |                                                |
| 3 |                      |    |                                                                                                                                                                                       |                                                |
| 4 | Sample size          | 14 | Estimated number of participants needed to achieve study objectives and how it was determined, including clinical and statistical assumptions supporting any sample size calculations | <a href="#">Page 13, line 275-291</a>          |
| 5 |                      |    |                                                                                                                                                                                       |                                                |
| 6 |                      |    |                                                                                                                                                                                       |                                                |
| 7 | Recruitment          | 15 | Strategies for achieving adequate participant enrolment to reach target sample size                                                                                                   | <a href="#">Page 13, line 275-291</a>          |
| 8 |                      |    |                                                                                                                                                                                       |                                                |
| 9 |                      |    |                                                                                                                                                                                       |                                                |

## 11 **Methods: Assignment of interventions (for controlled trials)**

### 13 Allocation:

|    |                                  |     |                                                                                                                                                                                                                                                                                                                                                          |                                       |
|----|----------------------------------|-----|----------------------------------------------------------------------------------------------------------------------------------------------------------------------------------------------------------------------------------------------------------------------------------------------------------------------------------------------------------|---------------------------------------|
| 15 | Sequence generation              | 16a | Method of generating the allocation sequence (eg, computer-generated random numbers), and list of any factors for stratification. To reduce predictability of a random sequence, details of any planned restriction (eg, blocking) should be provided in a separate document that is unavailable to those who enrol participants or assign interventions | <a href="#">Page 7, line 137-139</a>  |
| 16 |                                  |     |                                                                                                                                                                                                                                                                                                                                                          |                                       |
| 17 |                                  |     |                                                                                                                                                                                                                                                                                                                                                          |                                       |
| 18 |                                  |     |                                                                                                                                                                                                                                                                                                                                                          |                                       |
| 19 |                                  |     |                                                                                                                                                                                                                                                                                                                                                          |                                       |
| 20 |                                  |     |                                                                                                                                                                                                                                                                                                                                                          |                                       |
| 21 | Allocation concealment mechanism | 16b | Mechanism of implementing the allocation sequence (eg, central telephone; sequentially numbered, opaque, sealed envelopes), describing any steps to conceal the sequence until interventions are assigned                                                                                                                                                | <a href="#">Page 7, line 136-139</a>  |
| 22 |                                  |     |                                                                                                                                                                                                                                                                                                                                                          |                                       |
| 23 |                                  |     |                                                                                                                                                                                                                                                                                                                                                          |                                       |
| 24 |                                  |     |                                                                                                                                                                                                                                                                                                                                                          |                                       |
| 25 | Implementation                   | 16c | Who will generate the allocation sequence, who will enrol participants, and who will assign participants to interventions                                                                                                                                                                                                                                | <a href="#">Page 12, line 247-251</a> |
| 26 |                                  |     |                                                                                                                                                                                                                                                                                                                                                          |                                       |
| 27 |                                  |     |                                                                                                                                                                                                                                                                                                                                                          |                                       |
| 28 | Blinding (masking)               | 17a | Who will be blinded after assignment to interventions (eg, trial participants, care providers, outcome assessors, data analysts), and how                                                                                                                                                                                                                | <a href="#">Page 12, line 247-251</a> |
| 29 |                                  |     |                                                                                                                                                                                                                                                                                                                                                          |                                       |
| 30 |                                  |     |                                                                                                                                                                                                                                                                                                                                                          |                                       |
| 31 |                                  | 17b | If blinded, circumstances under which unblinding is permissible, and procedure for revealing a participant's allocated intervention during the trial                                                                                                                                                                                                     | <a href="#">Page 12, line 247-251</a> |
| 32 |                                  |     |                                                                                                                                                                                                                                                                                                                                                          |                                       |
| 33 |                                  |     |                                                                                                                                                                                                                                                                                                                                                          |                                       |

## 35 **Methods: Data collection, management, and analysis**

|    |                         |     |                                                                                                                                                                                                                                                                                                                                                                                                              |                                      |
|----|-------------------------|-----|--------------------------------------------------------------------------------------------------------------------------------------------------------------------------------------------------------------------------------------------------------------------------------------------------------------------------------------------------------------------------------------------------------------|--------------------------------------|
| 37 | Data collection methods | 18a | Plans for assessment and collection of outcome, baseline, and other trial data, including any related processes to promote data quality (eg, duplicate measurements, training of assessors) and a description of study instruments (eg, questionnaires, laboratory tests) along with their reliability and validity, if known. Reference to where data collection forms can be found, if not in the protocol | <a href="#">Page 8, line 172-177</a> |
| 38 |                         |     |                                                                                                                                                                                                                                                                                                                                                                                                              |                                      |
| 39 |                         |     |                                                                                                                                                                                                                                                                                                                                                                                                              |                                      |
| 40 |                         |     |                                                                                                                                                                                                                                                                                                                                                                                                              |                                      |
| 41 |                         |     |                                                                                                                                                                                                                                                                                                                                                                                                              |                                      |
| 42 |                         |     |                                                                                                                                                                                                                                                                                                                                                                                                              |                                      |

|    |                                 |     |                                                                                                                                                                                                                                                                                                                                       |                                |
|----|---------------------------------|-----|---------------------------------------------------------------------------------------------------------------------------------------------------------------------------------------------------------------------------------------------------------------------------------------------------------------------------------------|--------------------------------|
| 1  |                                 | 18b | Plans to promote participant retention and complete follow-up, including list of any outcome data to be collected for participants who discontinue or deviate from intervention protocols                                                                                                                                             | <u>Page 10, line 218-247</u>   |
| 2  |                                 |     |                                                                                                                                                                                                                                                                                                                                       |                                |
| 3  |                                 |     |                                                                                                                                                                                                                                                                                                                                       |                                |
| 4  | Data management                 | 19  | Plans for data entry, coding, security, and storage, including any related processes to promote data quality (eg, double data entry; range checks for data values). Reference to where details of data management procedures can be found, if not in the protocol                                                                     | <u>Page 15, line 310</u>       |
| 5  |                                 |     |                                                                                                                                                                                                                                                                                                                                       |                                |
| 6  |                                 |     |                                                                                                                                                                                                                                                                                                                                       |                                |
| 7  |                                 |     |                                                                                                                                                                                                                                                                                                                                       |                                |
| 8  | Statistical methods             | 20a | Statistical methods for analysing primary and secondary outcomes. Reference to where other details of the statistical analysis plan can be found, if not in the protocol                                                                                                                                                              | <u>Page 16, line 332-346</u>   |
| 9  |                                 |     |                                                                                                                                                                                                                                                                                                                                       |                                |
| 10 |                                 |     |                                                                                                                                                                                                                                                                                                                                       |                                |
| 11 |                                 | 20b | Methods for any additional analyses (eg, subgroup and adjusted analyses)                                                                                                                                                                                                                                                              | <u>Page 16, line 332-346</u>   |
| 12 |                                 |     |                                                                                                                                                                                                                                                                                                                                       |                                |
| 13 |                                 |     |                                                                                                                                                                                                                                                                                                                                       |                                |
| 14 |                                 |     |                                                                                                                                                                                                                                                                                                                                       |                                |
| 15 |                                 | 20c | Definition of analysis population relating to protocol non-adherence (eg, as randomised analysis), and any statistical methods to handle missing data (eg, multiple imputation)                                                                                                                                                       | <u>Page 16, line 343-344</u>   |
| 16 |                                 |     |                                                                                                                                                                                                                                                                                                                                       |                                |
| 17 |                                 |     |                                                                                                                                                                                                                                                                                                                                       |                                |
| 18 |                                 |     |                                                                                                                                                                                                                                                                                                                                       |                                |
| 19 | <b>Methods: Monitoring</b>      |     |                                                                                                                                                                                                                                                                                                                                       |                                |
| 20 |                                 |     |                                                                                                                                                                                                                                                                                                                                       |                                |
| 21 | Data monitoring                 | 21a | Composition of data monitoring committee (DMC); summary of its role and reporting structure; statement of whether it is independent from the sponsor and competing interests; and reference to where further details about its charter can be found, if not in the protocol. Alternatively, an explanation of why a DMC is not needed | <u>Page 16, line 330 - 332</u> |
| 22 |                                 |     |                                                                                                                                                                                                                                                                                                                                       |                                |
| 23 |                                 |     |                                                                                                                                                                                                                                                                                                                                       |                                |
| 24 |                                 |     |                                                                                                                                                                                                                                                                                                                                       |                                |
| 25 |                                 |     |                                                                                                                                                                                                                                                                                                                                       |                                |
| 26 |                                 | 21b | Description of any interim analyses and stopping guidelines, including who will have access to these interim results and make the final decision to terminate the trial                                                                                                                                                               | <u>Page 16, line 329 - 331</u> |
| 27 |                                 |     |                                                                                                                                                                                                                                                                                                                                       |                                |
| 28 |                                 |     |                                                                                                                                                                                                                                                                                                                                       |                                |
| 29 | Harms                           | 22  | Plans for collecting, assessing, reporting, and managing solicited and spontaneously reported adverse events and other unintended effects of trial interventions or trial conduct                                                                                                                                                     | <u>Page 14, line 300-304</u>   |
| 30 |                                 |     |                                                                                                                                                                                                                                                                                                                                       |                                |
| 31 |                                 |     |                                                                                                                                                                                                                                                                                                                                       |                                |
| 32 |                                 |     |                                                                                                                                                                                                                                                                                                                                       |                                |
| 33 | Auditing                        | 23  | Frequency and procedures for auditing trial conduct, if any, and whether the process will be independent from investigators and the sponsor                                                                                                                                                                                           | <u>Page 15, line 324-325</u>   |
| 34 |                                 |     |                                                                                                                                                                                                                                                                                                                                       |                                |
| 35 |                                 |     |                                                                                                                                                                                                                                                                                                                                       |                                |
| 36 |                                 |     |                                                                                                                                                                                                                                                                                                                                       |                                |
| 37 | <b>Ethics and dissemination</b> |     |                                                                                                                                                                                                                                                                                                                                       |                                |
| 38 |                                 |     |                                                                                                                                                                                                                                                                                                                                       |                                |
| 39 | Research ethics approval        | 24  | Plans for seeking research ethics committee/institutional review board (REC/IRB) approval                                                                                                                                                                                                                                             | <u>Page 15, line 318</u>       |
| 40 |                                 |     |                                                                                                                                                                                                                                                                                                                                       |                                |
| 41 |                                 |     |                                                                                                                                                                                                                                                                                                                                       |                                |
| 42 |                                 |     |                                                                                                                                                                                                                                                                                                                                       |                                |
| 43 |                                 |     |                                                                                                                                                                                                                                                                                                                                       |                                |
| 44 |                                 |     |                                                                                                                                                                                                                                                                                                                                       |                                |
| 45 |                                 |     |                                                                                                                                                                                                                                                                                                                                       |                                |
| 46 |                                 |     |                                                                                                                                                                                                                                                                                                                                       |                                |

|    |                      |     |                                                                                                                 |                           |
|----|----------------------|-----|-----------------------------------------------------------------------------------------------------------------|---------------------------|
| 1  | Protocol             | 25  | Plans for communicating important protocol modifications (eg, changes to eligibility criteria, outcomes,        | <u>Page 15, line 325</u>  |
| 2  | amendments           |     | analyses) to relevant parties (eg, investigators, REC/IRBs, trial participants, trial registries, journals,     |                           |
| 3  |                      |     | regulators)                                                                                                     |                           |
| 4  |                      |     |                                                                                                                 |                           |
| 5  | Consent or assent    | 26a | Who will obtain informed consent or assent from potential trial participants or authorised surrogates, and      | <u>Page 15, line 323-</u> |
| 6  |                      |     | how (see Item 32)                                                                                               | <u>324</u>                |
| 7  |                      |     |                                                                                                                 |                           |
| 8  |                      | 26b | Additional consent provisions for collection and use of participant data and biological specimens in ancillary  | <u>Page 15, line 321-</u> |
| 9  |                      |     | studies, if applicable                                                                                          | <u>323</u>                |
| 10 |                      |     |                                                                                                                 |                           |
| 11 | Confidentiality      | 27  | How personal information about potential and enrolled participants will be collected, shared, and maintained    | <u>Page 15, line 310-</u> |
| 12 |                      |     | in order to protect confidentiality before, during, and after the trial                                         | <u>312</u>                |
| 13 |                      |     |                                                                                                                 |                           |
| 14 | Declaration of       | 28  | Financial and other competing interests for principal investigators for the overall trial and each study site   | <u>Page 19, line 413</u>  |
| 15 | interests            |     |                                                                                                                 |                           |
| 16 |                      |     |                                                                                                                 |                           |
| 17 |                      |     |                                                                                                                 |                           |
| 18 | Access to data       | 29  | Statement of who will have access to the final trial dataset, and disclosure of contractual agreements that     | <u>Page 15, line 312</u>  |
| 19 |                      |     | limit such access for investigators                                                                             |                           |
| 20 |                      |     |                                                                                                                 |                           |
| 21 | Ancillary and post-  | 30  | Provisions, if any, for ancillary and post-trial care, and for compensation to those who suffer harm from trial | <u>Page 14, line 303-</u> |
| 22 | trial care           |     | participation                                                                                                   | <u>304</u>                |
| 23 |                      |     |                                                                                                                 |                           |
| 24 | Dissemination policy | 31a | Plans for investigators and sponsor to communicate trial results to participants, healthcare professionals,     | <u>Page 15, line 325-</u> |
| 25 |                      |     | the public, and other relevant groups (eg, via publication, reporting in results databases, or other data       | <u>327</u>                |
| 26 |                      |     | sharing arrangements), including any publication restrictions                                                   |                           |
| 27 |                      |     |                                                                                                                 |                           |
| 28 |                      |     |                                                                                                                 |                           |
| 29 |                      | 31b | Authorship eligibility guidelines and any intended use of professional writers                                  | <u>Page 16, line 329</u>  |
| 30 |                      |     |                                                                                                                 |                           |
| 31 |                      | 31c | Plans, if any, for granting public access to the full protocol, participant-level dataset, and statistical code | <u>Page 16, line 329</u>  |
| 32 |                      |     |                                                                                                                 |                           |
| 33 | <b>Appendices</b>    |     |                                                                                                                 |                           |
| 34 |                      |     |                                                                                                                 |                           |
| 35 | Informed consent     | 32  | Model consent form and other related documentation given to participants and authorised surrogates              | <u>Page 15, line 323-</u> |
| 36 | materials            |     |                                                                                                                 | <u>324</u>                |
| 37 |                      |     |                                                                                                                 |                           |
| 38 | Biological           | 33  | Plans for collection, laboratory evaluation, and storage of biological specimens for genetic or molecular       | <u>Page 13, line 263-</u> |
| 39 | specimens            |     | analysis in the current trial and for future use in ancillary studies, if applicable                            | <u>274</u>                |
| 40 |                      |     |                                                                                                                 |                           |
| 41 |                      |     |                                                                                                                 |                           |

1 \*It is strongly recommended that this checklist be read in conjunction with the SPIRIT 2013 Explanation & Elaboration for important clarification on the items.  
2 Amendments to the protocol should be tracked and dated. The SPIRIT checklist is copyrighted by the SPIRIT Group under the Creative Commons  
3 “Attribution-NonCommercial-NoDerivs 3.0 Unported” license.  
4  
5  
6  
7  
8  
9  
10  
11  
12  
13  
14  
15  
16  
17  
18  
19  
20  
21  
22  
23  
24  
25  
26  
27  
28  
29  
30  
31  
32  
33  
34  
35  
36  
37  
38  
39  
40  
41  
42  
43  
44  
45  
46

For peer review only
